# Supplementary material for: CELF4 Regulates Translation and Local Abundance of a Vast Set of mRNAs, Including Genes Associated with Regulation of Synaptic Function
Source: PLoS Genet. 2012 Nov 29;8(11):e1003067. doi: 10.1371/journal.pgen.1003067 (PMC3510034; doi:10.1371/journal.pgen.1003067)
Supplement: File S8 — Posthoc analyses of 142 cb vs. np enriched genes from GO models. Workbook with multiple worksheets that shows the results of the GO analysis of Celf4-genotype dependent subcellular gene expression shifts of CELF4 targets. Genes are listed by the Mouse Genome Database ID. (XLSX) [file pgen.1003067.s010.xlsx]

## Sheet: 142 list
142 Enriched CELF4 targets
ID	Name
Adam23	a disintegrin and metallopeptidase domain 23
Adam9	a disintegrin and metallopeptidase domain 9 (meltrin gamma)
Amigo2	adhesion molecule with Ig like domain 2
Anks1b	ankyrin repeat and sterile alpha motif domain containing 1B
Arhgap32	Rho GTPase activating protein 32
Arhgap6	Rho GTPase activating protein 6
Atad1	ATPase family, AAA domain containing 1
Atp2b2	ATPase, Ca++ transporting, plasma membrane 2
Cadm1	cell adhesion molecule 1
Cald1	caldesmon 1
Camk2n1	calcium/calmodulin-dependent protein kinase II inhibitor 1
Cd2ap	CD2-associated protein
Cd38	CD38 antigen
Cdh10	cadherin 10
Cdh2	cadherin 2
Cdh24	cadherin-like 24
Cdh6	cadherin 6
Cdh7	cadherin 7, type 2
Chrm3	cholinergic receptor, muscarinic 3, cardiac
Cntn1	contactin 1
Cntn4	contactin 4
Cntn6	contactin 6
Cntnap4	contactin associated protein-like 4
Cntnap5a	contactin associated protein-like 5A
Col12a1	collagen, type XII, alpha 1
Cplx2	complexin 2
Cxadr	coxsackie virus and adenovirus receptor
Dnajb6	DnaJ (Hsp40) homolog, subfamily B, member 6
Dnm3	dynamin 3
Dpysl2	dihydropyrimidinase-like 2
Dscam	Down syndrome cell adhesion molecule
Dscaml1	Down syndrome cell adhesion molecule like 1
Efr3a	EFR3 homolog A (S. cerevisiae)
Egfr	epidermal growth factor receptor
Egr1	early growth response 1
Emb	embigin
Epdr1	ependymin related protein 1 (zebrafish)
Erbb4	v-erb-a erythroblastic leukemia viral oncogene homolog 4 (avian)
Erc2	ELKS/RAB6-interacting/CAST family member 2
Fat1	FAT tumor suppressor homolog 1 (Drosophila)
Fer	fer (fms/fps related) protein kinase
Fzd3	frizzled homolog 3 (Drosophila)
Fzd7	frizzled homolog 7 (Drosophila)
Gabra1	gamma-aminobutyric acid (GABA) A receptor, subunit alpha 1
Gabra2	gamma-aminobutyric acid (GABA) A receptor, subunit alpha 2
Gabrb1	gamma-aminobutyric acid (GABA) A receptor, subunit beta 1
Gabrg2	gamma-aminobutyric acid (GABA) A receptor, subunit gamma 2
Gabrg3	gamma-aminobutyric acid (GABA) A receptor, subunit gamma 3
Gad2	glutamic acid decarboxylase 2
Glra2	glycine receptor, alpha 2 subunit
Glra3	glycine receptor, alpha 3 subunit
Glrb	glycine receptor, beta subunit
Gopc	golgi associated PDZ and coiled-coil motif containing
Gp1bb	glycoprotein Ib, beta polypeptide
Gria3	glutamate receptor, ionotropic, AMPA3 (alpha 3)
Grid1	glutamate receptor, ionotropic, delta 1
Grin2b	glutamate receptor, ionotropic, NMDA2B (epsilon 2)
Grm1	glutamate receptor, metabotropic 1
Grm3	glutamate receptor, metabotropic 3
Grm5	glutamate receptor, metabotropic 5
Grm8	glutamate receptor, metabotropic 8
Gsk3b	glycogen synthase kinase 3 beta
Hcn4	hyperpolarization-activated, cyclic nucleotide-gated K+ 4
Homer2	homer homolog 2 (Drosophila)
Itgb8	integrin beta 8
Kcnb1	potassium voltage gated channel, Shab-related subfamily, member 1
Kcnd2	potassium voltage-gated channel, Shal-related family, member 2
Kcnma1	potassium large conductance calcium-activated channel, subfamily M, alpha member 1
Lmln	leishmanolysin-like (metallopeptidase M8 family)
Lmo7	LIM domain only 7
Lzts1	leucine zipper, putative tumor suppressor 1
Magee1	melanoma antigen, family E, 1
Mecp2	methyl CpG binding protein 2
Megf10	multiple EGF-like-domains 10
Mib1	mindbomb homolog 1 (Drosophila)
Mtap1b	microtubule-associated protein 1B
Myo5a	myosin VA
Nbea	neurobeachin
Ncam1	neural cell adhesion molecule 1
Ncdn	neurochondrin
Ncoa2	nuclear receptor coactivator 2
Nf1	neurofibromatosis 1
Nlgn1	neuroligin 1
Npnt	nephronectin
Nptn	neuroplastin
Nrp1	neuropilin 1
Nrxn3	neurexin III
Nsf	N-ethylmaleimide sensitive fusion protein
Ntm	neurotrimin
Ntn1	netrin 1
Omg	oligodendrocyte myelin glycoprotein
Pcdh11x	protocadherin 11 X-linked
Pcdh15	protocadherin 15
Pcdh18	protocadherin 18
Pcdhb14	protocadherin beta 14
Pcdhb18	protocadherin beta 18
Pcdhb19	protocadherin beta 19
Pcdhb2	protocadherin beta 2
Pcdhb22	protocadherin beta 22
Pcdhb3	protocadherin beta 3
Pcdhb4	protocadherin beta 4
Pcdhb5	protocadherin beta 5
Pcdhb6	protocadherin beta 6
Pcdhb7	protocadherin beta 7
Pdgfra	platelet derived growth factor receptor, alpha polypeptide
Pdpk1	3-phosphoinositide dependent protein kinase 1
Pdzd2	PDZ domain containing 2
Pja2	praja 2, RING-H2 motif containing
Plcb1	phospholipase C, beta 1
Ppap2b	phosphatidic acid phosphatase type 2B
Prkce	protein kinase C, epsilon
Psd3	pleckstrin and Sec7 domain containing 3
Ptprf	protein tyrosine phosphatase, receptor type, F
Rab3c	RAB3C, member RAS oncogene family
Rasgrf1	RAS protein-specific guanine nucleotide-releasing factor 1
Rims1	regulating synaptic membrane exocytosis 1
Scamp1	secretory carrier membrane protein 1
Scamp5	secretory carrier membrane protein 5
Serpine2	serine (or cysteine) peptidase inhibitor, clade E, member 2
Sfrp1	secreted frizzled-related protein 1
Slc17a6	solute carrier family 17 (sodium-dependent inorganic phosphate cotransporter), member 6
Slc17a7	solute carrier family 17 (sodium-dependent inorganic phosphate cotransporter), member 7
Slc1a2	solute carrier family 1 (glial high affinity glutamate transporter), member 2
Slc24a2	solute carrier family 24 (sodium/potassium/calcium exchanger), member 2
Slc2a3	solute carrier family 2 (facilitated glucose transporter), member 3
Snap91	synaptosomal-associated protein 91
Sos1	son of sevenless homolog 1 (Drosophila)
Sox9	SRY-box containing gene 9
Ston2	stonin 2
Stxbp1	syntaxin binding protein 1
Syn3	synapsin III
Syngr3	synaptogyrin 3
Syp	synaptophysin
Syt1	synaptotagmin I
Syt10	synaptotagmin X
Syt4	synaptotagmin IV
Tanc1	tetratricopeptide repeat, ankyrin repeat and coiled-coil containing 1
Thy1	thymus cell antigen 1, theta
Tro	trophinin
Unc13b	unc-13 homolog B (C. elegans)
Vgf	VGF nerve growth factor inducible
Ywhag	tyrosine 3-monooxygenase/tryptophan 5-monooxygenase activation protein, gamma polypeptide

## Sheet: logp from Fisher Exact tests
			Fisher exact	Fisher exact				category membership for Figure 8B analysis
GO category	∆ log p	N	cb p	somes p	cb log p	somes log p		from experiment	location	molecular function
lipid binding	-6.80936	26	1e-07	0.6447	-7	-0.190642			xx
Synapse part (expt)	-5.22994	136	1e-06	0.1698	-6	-0.770062		xx
synaptic membrane	-3.91312	76	0.0001	0.8187	-4	-0.0868752			xx
transporter activity	-3.52288	50	0.0003	1	-3.52288	0				xx
phospholipid binding	-3.32572	22	0.0003	0.6351	-3.52288	-0.197158			xx
Reg. synaptic plasticity (experiment)	-3.2266	42	0.0003	0.5055	-3.52288	-0.296279		xx
transmembrane transporter activity	-3.04576	42	0.0009	1	-3.04576	0				xx
postsynaptic membrane	-2.82391	60	0.0015	1	-2.82391	0			xx
cytosol	-2.04096	32	0.0091	1	-2.04096	0			xx
channel activity	-2.04096	32	0.0091	1	-2.04096	0				xx
synaptosome	-1.56736	25	0.0112	0.4136	-1.95078	-0.383419			xx
endomembrane system	-1.40204	32	0.0059	0.1489	-2.22915	-0.827105			xx
membrane fraction	-1.38647	42	0.0089	0.2167	-2.05061	-0.664141			xx
gated channel activity	-1.3363	28	0.0461	1	-1.3363	0				xx
secretory granule	-1.31605	17	0.0152	0.3147	-1.81816	-0.502103			xx
neuron spine	-1.30698	44	0.0268	0.5434	-1.57187	-0.26488			xx
GTPase regulator activity	-1.30277	18	0.0498	1	-1.30277	0				xx
vesicle membrane	-1.2713	20	0.0198	0.3698	-1.70333	-0.432033			xx
cytoplasmic vesicle part	-1.2713	20	0.0198	0.3698	-1.70333	-0.432033			xx
cytoplasmic vesicle membrane	-1.2713	20	0.0198	0.3698	-1.70333	-0.432033			xx
nucleoside-triphosphatase regulator activity	-1.24185	20	0.0573	1	-1.24185	0				xx
extracellular ligand-gated ion channel activity	-1.15614	20	0.0698	1	-1.15614	0				xx
syntaxin binding	-1.1392	15	0.0406	0.5594	-1.39147	-0.252278
SNARE binding	-1.1392	15	0.0406	0.5594	-1.39147	-0.252278
coated vesicle membrane	-1.10705	18	0.0498	0.6372	-1.30277	-0.195724			xx
clathrin coated vesicle membrane	-1.10705	18	0.0498	0.6372	-1.30277	-0.195724			xx
ligand-gated ion channel activity	-1.0942	22	0.0805	1	-1.0942	0				xx
ligand-gated channel activity	-1.0942	22	0.0805	1	-1.0942	0				xx
neuron projection terminus	-1.04612	19	0.0573	0.6372	-1.24185	-0.195724			xx
glutamate receptor activity	-0.988853	14	0.1026	1	-0.988853	0				xx
dendritic shaft	-0.988853	13	0.1026	1	-0.988853	0			xx
synaptic vesicle	-0.978746	38	0.0201	0.1914	-1.6968	-0.718058			xx
inorganic anion transmembrane transporter activity	-0.814175	18	0.1534	1	-0.814175	0				xx
PDZ domain binding	-0.770062	20	0.1698	1	-0.770062	0				xx
anion transmembrane transporter activity	-0.770062	20	0.1698	1	-0.770062	0				xx
calcium ion binding	-0.734344	30	0.0502	0.2723	-1.2993	-0.564952				xx
synaptic vesicle membrane	-0.716719	16	0.1189	0.6193	-0.924818	-0.208099			xx
axon terminus	-0.666255	17	0.1312	0.6084	-0.882066	-0.215811			xx
presynaptic membrane	-0.645873	26	0.0968	0.4283	-1.01412	-0.368252			xx
axon part	-0.626286	21	0.1486	0.6285	-0.827981	-0.201695			xx
excitatory extracellular ligand-gated ion channel activity	-0.615467	12	0.2424	1	-0.615467	0				xx
small GTPase regulator activity	-0.575608	14	0.2657	1	-0.575608	0				xx
chloride transmembrane transporter activity	-0.502103	16	0.3147	1	-0.502103	0				xx
chloride channel activity	-0.502103	16	0.3147	1	-0.502103	0				xx
anion channel activity	-0.502103	16	0.3147	1	-0.502103	0				xx
ion channel complex	-0.45618	20	0.3498	1	-0.45618	0				xx
site of polarized growth	-0.325972	22	0.1827	0.387	-0.738261	-0.412289			xx
growth cone	-0.325972	22	0.1827	0.387	-0.738261	-0.412289			xx
cell adhesion molecule binding	-0.263205	12	0.5455	1	-0.263205	0				xx
chloride channel complex	-0.227605	14	0.5921	1	-0.227605	0				xx
membrane raft	-0.215811	16	0.6084	1	-0.215811	0			xx
apical plasma membrane	0	12	1	1	0	0			xx
apical	0	16	1	1	0	0			xx
amine binding	0	12	1	1	0	0				xx
anchored to membrane	0.0474937	16	0.3147	0.2821	-0.502103	-0.549597			xx
protein homodimerization activity	0.180851	22	1	0.6594	0	-0.180851				xx
cell leading edge	0.207678	18	1	0.6199	0	-0.207678			xx
cell-cell junction	0.227605	14	1	0.5921	0	-0.227605			xx
beta-catenin binding	0.227605	14	1	0.5921	0	-0.227605				xx
excitatory synapse	0.352262	12	0.5455	0.2424	-0.263205	-0.615467			xx
cell adhesion (expt)	1.22915	132	0.0495765	-2.53387	-1.30472	0.002925		xx

## Sheet: main table with 2x2 calculator
	2x2 calcs here	polysomes experiment				cell axis experiment										Raw and averaged and ratio'd data over here
	Category	Odds ratio	null poly/mono	wt poly/mono	Direction of effect	Odds ratio	null np/cb	wt np/cb	Odds ratio diff
	Reg. synaptic plasticity		16	13	>1		19	7	17.0308
		1.96923	5	8	<1	19	2	14
	Cell adhesion		41	23	>1		44	31	-0.808022
		3.06609	25	43	<1	2.25806	22	35
	Synapse part		38	29	>1		56	30	4.20766
		1.70345	30	39	<1	5.91111	12	38
	transporter activity		7	6	>1		22	9	11.8056
		1.23148	18	19	<1	13.037	3	16
	channel activity		4	4	>1		14	6	10.6667
		1	12	12	<1	11.6667	2	10
	synaptic membrane		20	18	>1		33	18	6.09877
		1.23457	18	20	<1	7.33333	5	20
	postsynaptic membrane		14	14	>1		26	15	5.5
		1	16	16	<1	6.5	4	15
	synaptosome		7	4	>1		12	5	#DIV/0!
		2.8	5	8	<1	#DIV/0!	0	7
	SH3 domain binding		3	3	>1		2	5	-0.9
		1	3	3	<1	0.1	4	1
	terminal button		2	0	>1		6	3	#DIV/0!
		#DIV/0!	4	6	<1	#DIV/0!	0	3
	amino acid binding		0	0	>1		2	2	#DIV/0!
		#DIV/0!	5	5	<1	1	3	3
	cell projection membrane		1	2	>1		4	3	2.29167
		0.375	4	3	<1	2.66667	1	2
	GABA receptor activity		0	1	>1		5	2	#DIV/0!
		0	5	4	<1	#DIV/0!	0	3
Don't remove this row!!!!!																		avg	avg	avg	avg	avg	avg	avg	avg	avg	avg	avg	avg	avg	avg	avg	avg	repl combs	repl combs	repl combs	repl combs	repl combs	repl combs	repl combs	repl combs	repl combs	repl combs	repl combs	repl combs	repl combs	repl combs	repl combs	repl combs
Enriched gene list here don't shuffle rows			Exp'tal results don't edit			Can paste in lists in the next 10 columns																												cb	cb	cb	cb	cb	cb	cb	cb	cb	np	np	np	np	np	np	np
Ensembl ID	Gene symbol	Name	Reg. synaptic plasticity	Cell adhesion	Synapse part	transporter activity	channel activity	synaptic membrane	postsynaptic membrane	synaptosome	SH3 domain binding	terminal button	amino acid binding	cell projection membrane	GABA receptor activity	iCLIP diff 1	Ranked iCLIP diff 1	ko poly/mono	wt poly/mono	ko np/cb	wt np/cb	ko cb avg	ko np avg	wt cb avg	wt np avg	ko gran avg	ko mono avg	ko poly avg	wt gran avg	wt mon avg	wt poly avg	ko mp avg	wt mp avg	ko1/wt1	ko1/wt2	ko1/wt3	ko2/wt1	ko2/wt2	ko2/wt3	ko3/wt1	ko3/wt2	ko3/wt3	ko1/wt1	ko1/wt2	ko1/wt3	ko2/wt1	ko2/wt2	ko2/wt3	ko3/wt1
ENSMUSG00000000127	Fer	fer (fms/fps related) protein kinase	no	yes	no	no	no	no	no	no	no	no	no	no	no	0.339	12797	1.03854	1.00314	1.04094	0.982286	8.51493	8.86351	8.74677	8.59183	8.07736	6.88333	7.14861	7.41257	7.07761	7.09984	7.01597	7.08873	1.00493	0.965546	0.968157	1.01212	0.97246	0.975089	0.980108	0.941699	0.944246	1.05272	1.01115	1.11784	1.03072	0.99002	1.09448	0.993732
ENSMUSG00000000560	Gabra2	gamma-aminobutyric acid (GABA) A receptor, subunit alpha 2	no	no	yes	transporter activity	channel activity	synaptic membrane	postsynaptic membrane	no	no	no	no	no	GABA receptor activity	0.488	13412	0.991608	0.962378	1.07437	1.03255	9.69425	10.4152	10.212	10.5444	10.5551	10.0685	9.98396	10.6232	10.4472	10.0541	10.0262	10.2506	0.960403	0.959454	0.898298	0.963801	0.962849	0.901476	0.990256	0.989277	0.92622	0.997883	0.977944	1.03761	1.01575	0.995451	1.05618	0.93194
ENSMUSG00000000567	Sox9	SRY-box containing gene 9	no	yes	no	no	no	no	no	no	no	no	no	no	no	0.316	12635	1.01388	0.97212	0.947895	1.02834	8.96932	8.50197	8.4691	8.70914	8.54798	7.17916	7.27882	8.24591	7.84601	7.62727	7.22899	7.73664	1.04549	1.09397	1.09998	1.0265	1.0741	1.08	1.00581	1.05244	1.05823	1.02888	0.892983	0.895896	1.06382	0.92331	0.926321	1.1294
ENSMUSG00000001986	Gria3	glutamate receptor, ionotropic, AMPA3 (alpha 3)	no	no	yes	transporter activity	channel activity	synaptic membrane	postsynaptic membrane	no	no	terminal button	no	no	no	1.958	14227	0.974937	0.973405	1.02503	0.990858	11.9674	12.267	12.1209	12.0101	10.7215	10.3779	10.1178	10.4389	10.401	10.1244	10.2479	10.2627	0.993645	0.984645	0.963773	1.00515	0.996048	0.974934	1.00284	0.993758	0.972692	1.03218	1.01387	1.06388	1.02228	1.00414	1.05367	0.997718
ENSMUSG00000002808	Epdr1	ependymin related protein 1 (zebrafish)	no	yes	no	no	no	no	no	no	no	no	no	no	no	0.552	13558	1.0414	1.05523	1.0364	0.992721	10.2744	10.6484	10.2719	10.1971	11.2643	10.846	11.295	11.0769	10.4111	10.9861	11.0705	10.6986	0.99555	0.975435	0.975714	0.987595	0.967641	0.967918	1.05857	1.03718	1.03748	1.04785	1.03402	1.10346	1.02299	1.00948	1.07728	1.02329
ENSMUSG00000003153	Slc2a3	solute carrier family 2 (facilitated glucose transporter), member 3	no	no	yes	transporter activity	no	no	no	no	no	no	no	no	no	0.495	13440	0.993467	0.983881	1.05178	0.987437	8.26315	8.69098	8.84603	8.7349	10.6851	10.2248	10.158	10.6971	10.4439	10.2755	10.1914	10.3597	0.96721	0.933214	0.918315	0.951777	0.918323	0.903662	0.967102	0.933109	0.918213	0.964011	1.06703	0.971977	0.966628	1.06992	0.974615	0.950063
ENSMUSG00000003974	Grm3	glutamate receptor, metabotropic 3	no	no	yes	no	no	synaptic membrane	postsynaptic membrane	no	no	no	no	no	no	0.331	12741	1.0233	1.0107	1.00967	1.04369	9.90512	10.0009	9.64279	10.0641	8.90976	8.29665	8.48995	8.78441	8.1894	8.27703	8.3933	8.23321	1.01996	1.0245	1.03349	1.01582	1.02034	1.0293	1.02783	1.0324	1.04147	1.00557	0.950581	0.956496	1.04078	0.983868	0.989991	1.04328
ENSMUSG00000005089	Slc1a2	solute carrier family 1 (glial high affinity glutamate transporter), member 2	no	no	yes	transporter activity	no	synaptic membrane	no	no	no	no	no	cell projection membrane	no	0.422	13196	0.976089	0.937522	1.02122	1.0513	13.8608	14.1549	13.6304	14.3297	12.9178	12.7071	12.4033	13.0553	13.265	12.4362	12.5552	12.8506	1.02	1.02276	1.02902	1.00533	1.00805	1.01422	1.01373	1.01647	1.0227	1.00839	0.952971	0.962286	1.00691	0.951569	0.96087	1.05288
ENSMUSG00000005886	Ncoa2	nuclear receptor coactivator 2	no	no	yes	no	no	no	no	no	no	no	no	no	no	0.452	13286	1.08211	1.05264	1.0096	0.991399	9.72361	9.81694	9.85611	9.77134	9.24968	7.56215	8.18304	8.73232	7.8047	8.21553	7.8726	8.01012	1.02584	0.998971	0.992606	1.0161	0.989486	0.983182	0.977296	0.951701	0.945638	1.00617	1.00459	1.01303	1.01422	1.01262	1.02113	0.988392
ENSMUSG00000007021	Syngr3	synaptogyrin 3	no	no	yes	no	no	no	no	no	no	no	no	no	no	0.895	13954	1.02595	1.00938	0.999365	0.970609	10.3473	10.3407	10.5642	10.2537	11.8702	11.7176	12.0217	12.263	12.0011	12.1137	11.8696	12.0574	0.99297	0.954973	0.989775	1.02758	0.988256	1.02427	0.959997	0.923262	0.956908	0.989711	1.00884	1.04754	0.990304	1.00944	1.04816	0.970663
ENSMUSG00000007989	Fzd3	frizzled homolog 3 (Drosophila)	no	no	yes	no	no	no	no	no	no	no	no	cell projection membrane	no	2.533	14252	0.902222	0.871961	1.03205	0.971821	8.13617	8.39691	8.65221	8.40839	4.50844	5.61156	5.06287	5.28155	5.8611	5.11065	5.33722	5.48588	0.93526	0.926326	0.894702	0.947999	0.938943	0.906889	0.989509	0.980057	0.946599	1.01166	0.965416	1.05555	1.04832	1.0004	1.0938	0.942234
ENSMUSG00000010803	Gabra1	gamma-aminobutyric acid (GABA) A receptor, subunit alpha 1	no	no	yes	transporter activity	channel activity	synaptic membrane	postsynaptic membrane	no	no	no	no	no	GABA receptor activity	0.937	13987	0.974707	0.983289	1.01814	0.962652	11.5345	11.7437	11.6296	11.1953	11.7372	11.5964	11.3031	11.3238	11.434	11.2429	11.4498	11.3385	0.987045	0.9644	0.95823	1.0099	0.986729	0.980416	1.03163	1.00797	1.00152	1.04588	1.06051	1.10072	1.01033	1.02447	1.06331	1.02403
ENSMUSG00000013662	Atad1	ATPase family, AAA domain containing 1	no	no	yes	no	no	synaptic membrane	postsynaptic membrane	no	no	no	no	no	no	0.299	12513	0.975974	0.982957	1.02094	0.99474	10.5023	10.7221	10.615	10.5591	10.4644	10.4058	10.1558	10.2961	10.3867	10.2097	10.2808	10.2982	0.986106	0.979272	0.963946	0.971507	0.964774	0.949674	1.04018	1.03297	1.01681	1.01984	1.01968	1.02438	1.02519	1.02503	1.02975	0.996943
ENSMUSG00000015002	Efr3a	EFR3 homolog A (S. cerevisiae)	no	yes	no	no	no	no	no	no	no	no	no	no	no	0.533	13515	1.00635	0.987257	1.03297	0.981239	9.53991	9.85446	9.56	9.38065	10.0273	10.1384	10.2028	9.9773	10.2194	10.0892	10.1706	10.1543	0.991702	0.988746	1.0011	1.00222	0.999234	1.01172	0.993384	0.990423	1.0028	1.034	1.05823	1.05471	1.01203	1.03575	1.0323	1.06081
ENSMUSG00000018589	Glra2	glycine receptor, alpha 2 subunit	no	no	yes	transporter activity	channel activity	synaptic membrane	postsynaptic membrane	no	no	no	amino acid binding	no	no	2.115	14238	0.987932	0.976065	0.865	1.03478	4.48855	3.88259	4.94183	5.11371	7.26596	7.43137	7.34169	7.35111	7.4544	7.27598	7.38653	7.36519	0.994348	0.82314	0.790129	1.1386	0.942557	0.904756	1.01555	0.840694	0.806978	0.955296	0.998256	0.829965	0.688619	0.719587	0.598276	0.715819
ENSMUSG00000019828	Grm1	glutamate receptor, metabotropic 1	no	no	yes	no	no	synaptic membrane	postsynaptic membrane	no	no	no	no	no	no	0.597	13637	0.983657	0.99746	0.928569	1.00359	8.31082	7.71717	8.43448	8.46476	8.23609	7.51677	7.39392	7.89544	7.51682	7.49773	7.45534	7.50728	1.0047	0.995237	1.01032	1.0296	1.01991	1.03536	0.925602	0.916885	0.930778	0.961839	1.03018	0.947748	0.954115	1.02191	0.940137	0.772163
ENSMUSG00000019861	Gopc	golgi associated PDZ and coiled-coil motif containing	no	no	yes	no	no	synaptic membrane	postsynaptic membrane	no	no	no	no	no	no	0.346	12842	1.07963	1.07594	1.03941	1.01061	8.10725	8.42679	8.36032	8.44905	9.55732	8.51424	9.19222	9.25844	8.51714	9.16394	8.85323	8.84054	0.980654	0.993828	0.953594	0.952561	0.965357	0.926276	0.990637	1.00395	0.963302	1.01058	1.00734	0.995307	1.00205	0.998834	0.986902	0.997984
ENSMUSG00000020122	Egfr	epidermal growth factor receptor	no	yes	no	no	no	no	no	no	no	no	no	no	no	0.436	13240	0.898135	0.872976	0.930001	1.05361	7.38737	6.87026	6.84121	7.20799	5.27808	5.52061	4.95825	5.46762	5.67241	4.95188	5.23943	5.31215	0.992449	1.02619	1.08615	1.11773	1.15573	1.22326	1.00066	1.03468	1.09514	0.970131	0.907447	0.881137	0.963557	0.901298	0.875167	1.08785
ENSMUSG00000020436	Gabrg2	gamma-aminobutyric acid (GABA) A receptor, subunit gamma 2	no	no	yes	transporter activity	channel activity	synaptic membrane	postsynaptic membrane	no	no	no	no	cell projection membrane	GABA receptor activity	0.327	12716	0.994647	1.00128	1.04114	0.994585	10.4169	10.8455	10.7944	10.7359	11.7067	11.177	11.1171	11.3885	11.0459	11.06	11.1471	11.0529	0.941514	0.929478	0.911887	0.998083	0.985324	0.966676	0.999333	0.986558	0.967887	1.02289	1.03443	1.01379	1.02281	1.03436	1.01372	0.982695
ENSMUSG00000020716	Nf1	neurofibromatosis 1	yes	no	yes	no	no	no	no	synaptosome	no	no	no	no	no	0.544	13541	1.0081	0.978327	1.01316	0.986829	9.65708	9.78416	9.73074	9.60258	8.99424	7.66053	7.72261	8.53361	7.90926	7.73784	7.69157	7.82355	0.997158	0.989498	0.991842	1.00144	0.993747	0.9961	0.991695	0.984077	0.986407	1.00489	0.998801	1.03332	1.02055	1.01437	1.04943	1.00946
ENSMUSG00000020902	Ntn1	netrin 1	no	yes	no	no	no	no	no	no	no	no	no	no	no	0.452	13299	1.01368	0.982845	0.957134	1.0806	4.91636	4.70562	4.54897	4.91562	6.24266	5.90541	5.98619	6.1501	5.65794	5.56087	5.9458	5.60941	1.14296	1.18372	1.16822	0.981357	1.01635	1.00304	1.05739	1.0951	1.08076	1.00586	0.855258	0.912352	0.90596	0.770314	0.821737	1.2267
ENSMUSG00000020961	Ston2	stonin 2	no	no	yes	no	no	no	no	no	no	no	no	no	no	0.339	12809	1.06926	0.980476	0.948904	1.06701	7.67428	7.28215	7.25368	7.73977	4.42861	3.86809	4.136	4.4802	4.01949	3.94102	4.00205	3.98026	1.04455	1.06493	1.10529	1.02394	1.04392	1.08348	1.02708	1.04712	1.08681	0.992546	0.916152	0.860288	0.980306	0.904854	0.849679	1.07287
ENSMUSG00000021687	Scamp1	secretory carrier membrane protein 1	no	no	yes	no	no	no	no	no	no	no	no	no	no	0.691	13779	1.00717	1.01051	1.06085	0.992485	10.5051	11.1444	11.169	11.0851	11.2426	11.1787	11.2589	11.1755	11.0927	11.2093	11.2188	11.151	0.940202	0.915945	0.883033	0.931862	0.90782	0.8752	1.03542	1.00871	0.972461	1.02397	0.986747	1.0064	1.03488	0.997265	1.01712	1.01268
ENSMUSG00000021700	Rab3c	RAB3C, member RAS oncogene family	no	no	yes	no	no	no	no	no	no	no	no	no	no	0.323	12682	1.04311	0.98836	1.02679	0.99282	11.362	11.6664	11.6363	11.5528	9.82811	9.9347	10.3629	10.4643	10.7128	10.5881	10.1488	10.6505	0.983996	0.979339	0.943583	1.00623	1.00147	0.964907	0.985512	0.980848	0.945036	1.00313	1.00543	1.03997	0.989616	0.991888	1.02596	0.998673
ENSMUSG00000021728	Emb	embigin	no	yes	no	no	no	no	no	no	no	no	no	no	no	0.56	13578	0.981696	1.00808	1.11854	0.963374	7.59863	8.49937	7.58601	7.30817	8.33055	8.29463	8.14281	8.21368	8.1719	8.23788	8.21872	8.20489	0.917698	0.922825	0.98443	0.950178	0.955487	1.01927	1.06365	1.06959	1.14099	1.14647	1.12537	1.14063	1.08364	1.0637	1.07812	1.28663
ENSMUSG00000022048	Dpysl2	dihydropyrimidinase-like 2	no	no	yes	no	no	no	no	synaptosome	no	terminal button	no	no	no	0.768	13861	0.990492	0.985635	1.00966	0.983006	11.5969	11.7089	11.8616	11.66	11.8362	11.0399	10.935	11.5152	11.3347	11.1719	10.9874	11.2533	0.97231	0.960334	0.945399	0.992545	0.98032	0.965073	1.00821	0.995796	0.980309	1.00847	0.986008	1.01406	1.01228	0.98974	1.01789	1.00917
ENSMUSG00000022197	Pdzd2	PDZ domain containing 2	no	no	yes	no	no	no	no	synaptosome	no	no	no	no	no	0.281	12386	1.05659	1.07812	1.04388	1.28071	4.73575	4.94356	4.39838	5.63304	7.21563	5.79828	6.12639	6.82325	5.74432	6.19307	5.96234	5.9687	1.07862	1.1481	1.13975	1.13569	1.20884	1.20005	0.892894	0.950411	0.9435	0.987772	0.871353	0.571185	1.20784	1.06548	0.698439	1.19452
ENSMUSG00000022321	Cdh10	cadherin 10	no	yes	no	no	no	no	no	no	no	no	no	no	no	0.328	12722	1.00682	0.960566	1.02627	0.962738	9.26964	9.51317	9.5548	9.19877	8.94192	8.23492	8.29111	8.48511	8.41584	8.08396	8.26302	8.2499	0.976942	0.948049	0.941275	0.97551	0.946659	0.939895	1.02434	0.99405	0.986947	0.996376	0.989101	1.11991	1.00262	0.995296	1.12692	0.997073
ENSMUSG00000022802	Lmln	leishmanolysin-like (metallopeptidase M8 family)	no	yes	no	no	no	no	no	no	no	no	no	no	no	0.578	13596	1.10798	1.12309	0.923037	1.03296	6.17897	5.70342	6.43318	6.64522	5.79398	5.20605	5.76822	5.86244	5.18488	5.82308	5.48713	5.50398	1.06598	0.906015	0.951051	1.11954	0.951537	0.998836	0.981582	0.834284	0.875755	0.923048	0.852836	0.936664	0.943205	0.87146	0.957118	0.766752
ENSMUSG00000022812	Gsk3b	glycogen synthase kinase 3 beta	yes	no	no	no	no	no	no	no	no	no	no	no	no	0.312	12615	1.029	1.00025	1.02053	0.990112	11.5526	11.7897	11.676	11.5605	10.1323	9.76229	10.0454	9.99585	10.0352	10.0377	9.90386	10.0365	1.00518	1.0026	0.9784	1.00933	1.00673	0.982435	0.983412	0.980884	0.957209	1.02334	1.01675	1.05519	1.01387	1.00734	1.04542	0.998091
ENSMUSG00000022865	Cxadr	coxsackie virus and adenovirus receptor	no	yes	no	no	no	no	no	no	no	no	no	no	no	1.246	14122	0.889323	0.894374	1.12221	0.96399	5.58798	6.2709	6.34852	6.11991	7.11787	7.665	6.81667	7.12627	7.92844	7.09099	7.24083	7.50972	0.826639	0.90074	0.847714	0.843623	0.919246	0.865131	0.876049	0.954579	0.898384	1.02041	1.04075	1.00086	1.02273	1.04312	1.00313	1.03087
ENSMUSG00000024083	Pja2	praja 2, RING-H2 motif containing	no	no	yes	no	no	synaptic membrane	postsynaptic membrane	no	no	no	no	no	no	0.48	13386	1.11004	1.08003	1.02138	0.976403	12.4187	12.6842	12.7808	12.4793	12.6957	10.0761	11.1849	11.9126	10.2206	11.0385	10.6305	10.6295	0.981932	0.971661	0.948941	0.970583	0.960431	0.937973	1.00652	0.995994	0.972705	1.01196	1.05012	1.05138	1.0024	1.0402	1.04145	0.959854
ENSMUSG00000024122	Pdpk1	3-phosphoinositide dependent protein kinase 1	no	yes	no	no	no	no	no	no	no	no	no	no	no	0.52	13491	1.05845	1.02387	-0.351366	-2.83097	10.4295	-3.66456	-3.88388	10.9951	9.87036	9.21931	9.75813	9.70971	9.4027	9.62712	9.48872	9.51491	0.946971	0.937437	-0.305855	0.965691	0.955968	-0.311902	1.00351	0.993411	-0.324118	1.0204	0.992571	1.03652	1.00941	0.981881	1.02536	-3.03384
ENSMUSG00000024211	Grm8	glutamate receptor, metabotropic 8	no	no	yes	no	no	synaptic membrane	no	no	no	no	no	no	no	1.307	14137	1.14501	1.06745	1.02653	0.861939	6.10016	6.26199	5.79114	4.99161	7.18784	5.87992	6.73258	7.04527	6.45973	6.89541	6.30625	6.67757	0.957753	0.945637	1.02792	1.09289	1.07906	1.17295	1.05103	1.03774	1.12803	1.21371	1.50853	1.24579	0.9154	1.13775	0.939595	1.35692
ENSMUSG00000024241	Sos1	son of sevenless homolog 1 (Drosophila)	no	no	yes	no	no	no	no	no	SH3 domain binding	no	no	no	no	0.931	13979	1.03372	1.02226	1.0156	0.99172	8.1955	8.32331	8.07804	8.01115	8.06254	7.36477	7.61314	7.76491	7.39901	7.56373	7.48895	7.48137	1.0244	1.03506	1.02067	1.01244	1.02298	1.00875	1.00004	1.01044	0.996394	1.03301	1.03766	1.05661	1.04107	1.04576	1.06485	1.01496
ENSMUSG00000024261	Syt4	synaptotagmin IV	no	no	yes	transporter activity	no	no	no	no	no	no	no	no	no	0.973	14011	0.954102	0.966811	1.04641	0.983223	9.71896	10.17	10.122	9.95214	10.8827	10.7408	10.2479	10.7441	10.8867	10.5254	10.4943	10.706	0.932924	0.946164	0.916517	0.96648	0.980196	0.949483	0.984905	0.998883	0.967584	0.974633	1.01274	1.07977	0.966477	1.00427	1.07073	0.986599
ENSMUSG00000024294	Mib1	mindbomb homolog 1 (Drosophila)	no	no	yes	no	no	no	no	no	no	no	no	no	no	1.046	14050	1.01786	1.01096	1.02404	1.05277	9.06112	9.27893	8.98996	9.46437	10.487	10.2516	10.4348	10.3915	10.3875	10.5013	10.3432	10.4444	1.02204	1.03828	0.9956	0.990376	1.00611	0.964753	1.02233	1.03858	0.995882	1.00551	0.986005	0.964971	1.00889	0.989316	0.96821	0.987405
ENSMUSG00000024304	Cdh2	cadherin 2	no	yes	yes	no	no	no	no	no	no	no	no	no	no	0.299	12512	1.00456	0.986479	1.00736	1.02526	9.73002	9.80164	9.75847	10.005	9.80341	9.1573	9.19902	9.53353	9.19405	9.06973	9.17816	9.13189	0.997084	0.989785	0.979005	1.02669	1.01918	1.00808	0.993245	0.985975	0.975236	0.997144	0.977165	0.997602	1.0012	0.981139	1.00166	0.960266
ENSMUSG00000024593	Megf10	multiple EGF-like-domains 10	no	yes	no	no	no	no	no	no	no	no	no	no	no	0.339	12789	0.911426	0.916731	1.04762	-1.08066	6.7562	7.07791	-6.61663	7.15031	6.7074	6.71345	6.11881	6.4229	6.54698	6.00182	6.41613	6.2744	-0.199241	0.972314	1.00859	-0.193475	0.944176	0.979398	-0.21743	1.06108	1.10066	1.04093	0.928029	0.903418	1.04992	0.93604	0.911217	1.14987
ENSMUSG00000025272	Tro	trophinin	no	yes	no	no	no	no	no	no	no	no	no	no	no	0.464	13340	1.1097	1.02258	1.041	0.994226	9.76348	10.1638	10.2188	10.1598	9.84632	7.67624	8.51831	9.25019	8.25895	8.44544	8.09727	8.3522	0.968412	0.929912	0.922838	1.00992	0.969774	0.962397	0.97473	0.935978	0.928858	0.9851	1.00366	1.01258	1.00339	1.0223	1.03138	0.967036
ENSMUSG00000025321	Itgb8	integrin beta 8	no	yes	no	no	no	no	no	no	no	no	no	no	no	0.654	13724	0.957604	0.944504	0.97047	1.07078	7.26675	7.05216	6.89121	7.379	7.50351	7.68175	7.35608	7.49809	7.75313	7.32287	7.51891	7.538	1.01493	1.03694	1.06713	1.01663	1.03868	1.06892	1.05796	1.0809	1.11237	0.986772	0.893316	0.824599	1.05247	0.952792	0.8795	1.11582
ENSMUSG00000025810	Nrp1	neuropilin 1	no	yes	no	no	no	no	no	no	no	no	no	no	no	0.651	13719	0.923368	0.926539	1.10547	1.02692	7.80871	8.63226	8.34284	8.56745	7.49782	7.63303	7.0481	7.4875	7.76417	7.19381	7.34056	7.47899	0.982041	0.962089	0.935406	0.931535	0.91261	0.887299	0.960427	0.940914	0.914819	0.997587	1.0174	1.03522	0.979442	0.998899	1.01639	0.989412
ENSMUSG00000025813	Homer2	homer homolog 2 (Drosophila)	no	no	yes	no	no	synaptic membrane	postsynaptic membrane	no	no	no	no	no	no	0.298	12505	0.878341	0.863998	1.05068	1.07229	10.5842	11.1206	10.66	11.4307	6.59361	8.35312	7.33689	6.79121	8.62051	7.4481	7.84501	8.03431	1.00814	1.02217	0.986584	0.986435	1.00016	0.965343	0.99215	1.00596	0.970936	0.985116	0.941152	0.98822	0.971825	0.928455	0.974888	1.00408
ENSMUSG00000025867	Cplx2	complexin 2	yes	no	no	no	no	no	no	no	no	no	no	no	no	0.374	13004	1.06658	1.03017	1.03828	1.06212	12.0195	12.4796	12.1211	12.8741	13.4452	13.3642	14.254	14.1689	13.5636	13.9728	13.8091	13.7682	1.0183	0.988597	0.98456	1.02867	0.998666	0.994588	0.991668	0.962746	0.958815	0.988344	0.968451	0.941043	0.993193	0.973203	0.94566	0.995177
ENSMUSG00000025964	Adam23	a disintegrin and metallopeptidase domain 23	no	yes	no	no	no	no	no	no	no	no	no	no	no	0.462	13332	0.981044	0.981494	1.02283	0.962901	10.3727	10.6096	10.3958	10.0101	10.3823	10.3897	10.1927	10.0074	10.1846	9.99612	10.2912	10.0904	1.01714	0.992242	0.989603	1.02184	0.996826	0.994175	1.00717	0.982521	0.979908	1.04527	1.05745	1.132	1.03171	1.04373	1.11732	1.00927
ENSMUSG00000026249	Serpine2	serine (or cysteine) peptidase inhibitor, clade E, member 2	yes	no	no	no	no	no	no	no	no	no	no	no	no	0.384	13041	1.01525	1.0364	1.01956	1.0555	11.0847	11.3016	10.8467	11.4487	11.7745	11.1569	11.327	11.7911	10.8401	11.2346	11.2419	11.0374	0.989789	1.02895	1.03581	0.992717	1.03199	1.03887	0.999023	1.03855	1.04547	0.977764	0.942091	0.95995	0.998113	0.961698	0.979928	1.04125
ENSMUSG00000026312	Cdh7	cadherin 7, type 2	no	yes	no	no	no	no	no	no	no	no	no	no	no	0.732	13819	0.994815	0.944029	1.22148	1.06665	5.37879	6.57007	5.55315	5.92327	6.20956	5.74692	5.71712	5.96884	5.78826	5.46428	5.73202	5.62627	0.868314	0.957864	0.908329	0.908625	1.00233	0.950497	0.995644	1.09833	1.04153	1.08013	1.21373	1.15686	0.930053	1.04509	0.996124	1.12175
ENSMUSG00000026787	Gad2	glutamic acid decarboxylase 2	no	no	yes	no	no	no	no	no	no	no	amino acid binding	no	no	0.693	13782	0.987204	0.979965	0.988645	1.0343	10.5645	10.4445	10.7038	11.0709	11.1053	10.4167	10.2834	10.8603	10.6808	10.4668	10.35	10.5738	0.990557	1.00613	0.976355	1.01058	1.02647	0.996095	0.958895	0.973971	0.945147	0.969106	0.911428	0.919346	0.953462	0.896715	0.904505	1.01846
ENSMUSG00000026797	Stxbp1	syntaxin binding protein 1	yes	yes	no	no	no	no	no	no	no	no	no	no	no	0.335	12759	1.05955	1.01099	1.01859	0.975182	11.8744	12.0952	12.0322	11.7335	14.4159	12.7222	13.4797	13.966	13.3805	13.5275	13.1009	13.454	1.00608	0.969752	0.970434	1.02379	0.986828	0.987522	1.00402	0.967767	0.968448	1.04528	1.03121	1.02608	1.03441	1.02049	1.01541	1.04613
ENSMUSG00000027799	Nbea	neurobeachin	no	no	yes	no	no	synaptic membrane	postsynaptic membrane	no	no	no	no	no	no	0.318	12648	1.05823	1.0309	-1.71358	0.981339	10.717	-18.3643	-3.71736	-3.64798	10.3553	8.39158	8.88019	9.84497	8.7858	9.05728	8.63589	8.92154	1.00773	-0.326119	0.95728	0.989825	-0.320324	0.940272	0.993135	-0.321396	0.943416	1	-2.95632	-3.00937	-0.341534	1.00968	1.0278	1
ENSMUSG00000028020	Glrb	glycine receptor, beta subunit	no	no	yes	transporter activity	channel activity	synaptic membrane	postsynaptic membrane	no	no	no	amino acid binding	no	no	1.697	14202	0.203057	0.992861	1.02201	0.980975	9.99861	10.2187	10.1559	9.96273	11.2638	11.5199	2.3392	11.1729	11.3095	11.2287	6.92956	11.2691	0.967426	0.949729	0.932434	0.992438	0.974284	0.956542	1.04895	1.02976	1.01101	1.01574	1.00194	1.03871	1.03761	1.0235	1.06107	1.01518
ENSMUSG00000028456	Unc13b	unc-13 homolog B (C. elegans)	yes	no	no	no	no	no	no	no	no	no	no	no	no	0.305	12548	1.17508	1.03451	1.05713	0.950588	8.36926	8.84735	8.68453	8.25541	7.9959	5.92414	6.96131	7.42477	6.70943	6.94098	6.44273	6.8252	1.0432	1.00823	1.0207	0.992617	0.959346	0.971209	0.909943	0.879443	0.890318	1.00829	1.11099	1.14682	0.987816	1.08844	1.12354	0.990472
ENSMUSG00000028517	Ppap2b	phosphatidic acid phosphatase type 2B	no	yes	no	no	no	no	no	no	no	no	no	no	no	0.333	12750	1.00992	0.994433	1.01428	1.06725	10.7755	10.9294	10.4018	11.1013	11.472	11.0533	11.1629	11.6104	11.1064	11.0446	11.1081	11.0755	1.04186	1.04137	1.02816	1.03278	1.03229	1.01919	1.04743	1.04694	1.03365	1.00959	0.948593	0.93218	1.02197	0.960223	0.94361	1.06704
ENSMUSG00000028833	Ncdn	neurochondrin	yes	no	no	no	no	no	no	no	no	no	no	no	no	0.271	12280	1.06848	1.02158	1.02275	0.996768	13.2647	13.5665	13.6053	13.5614	14.9949	12.7079	13.5781	14.4439	13.318	13.6054	13.143	13.4617	1.00441	0.947058	0.967979	0.998496	0.941478	0.962276	1.01772	0.959604	0.980803	1.01603	1.01005	1.01431	1.02161	1.0156	1.01988	0.971121
ENSMUSG00000029084	Cd38	CD38 antigen	yes	no	no	no	no	no	no	no	no	no	no	no	no	0.484	13402	1.00174	0.998446	1.02823	1.06202	6.69408	6.88307	6.52998	6.93499	5.20872	5.64924	5.65907	5.16395	5.38536	5.37699	5.65416	5.38117	1.01555	1.08218	0.979373	1.02763	1.09505	0.991024	1.00696	1.07302	0.971089	1.00894	0.962239	1.01735	0.993506	0.947522	1.00179	1.01506
ENSMUSG00000029131	Dnajb6	DnaJ (Hsp40) homolog, subfamily B, member 6	no	yes	no	no	no	no	no	no	no	no	no	no	no	0.317	12646	1.03259	1.03075	1.0476	1.01211	9.54145	9.99563	9.94703	10.0675	10.931	10.5254	10.8685	11.0907	10.7388	11.069	10.6969	10.9039	0.928038	0.965101	0.949858	0.905592	0.941758	0.926884	0.985178	1.02452	1.00834	0.979828	1.00713	1.02881	0.992104	1.01975	1.0417	0.93248
ENSMUSG00000029212	Gabrb1	gamma-aminobutyric acid (GABA) A receptor, subunit beta 1	no	no	yes	transporter activity	channel activity	synaptic membrane	postsynaptic membrane	no	no	no	no	no	GABA receptor activity	0.382	13031	0.985164	0.941807	1.05278	1.01854	9.22026	9.70693	9.64993	9.82886	8.17218	8.01395	7.89506	8.40527	8.6922	8.18637	7.95451	8.43928	0.972071	0.966105	0.918796	0.979061	0.973052	0.925403	0.976594	0.9706	0.923071	0.993853	1.01252	1.00932	0.997898	1.01664	1.01343	0.937689
ENSMUSG00000029231	Pdgfra	platelet derived growth factor receptor, alpha polypeptide	no	yes	no	no	no	no	no	no	no	no	no	no	no	0.381	13027	0.987658	0.987001	0.991133	1.08245	8.08492	8.01322	7.65814	8.28953	8.3188	7.90993	7.8123	8.41022	7.97307	7.86943	7.86112	7.92125	1.03085	1.09816	1.06846	1.01267	1.07879	1.04961	1.02181	1.08852	1.05908	0.965202	0.933874	0.884652	0.972464	0.9409	0.891307	1.08279
ENSMUSG00000029761	Cald1	caldesmon 1	no	no	yes	no	no	no	no	no	no	no	no	no	no	0.288	12431	0.822969	0.97714	0.969188	1.11835	8.40088	8.14203	7.88175	8.81458	7.66094	8.4614	6.96347	7.5095	7.64115	7.46647	7.71243	7.55381	0.968343	1.18349	1.12512	0.949864	1.1609	1.10365	0.937102	1.14531	1.08882	0.941845	0.942875	0.860319	0.919165	0.92017	0.839601	0.996616
ENSMUSG00000030092	Cntn6	contactin 6	no	yes	no	no	no	no	no	no	no	no	no	no	no	0.354	12877	1.03534	0.960628	1.07097	0.894859	4.6432	4.97272	5.53193	4.9503	7.03556	6.20038	6.4195	6.51898	6.47889	6.2238	6.30994	6.35134	0.829036	0.755338	0.983177	0.746335	0.679988	0.885099	0.892971	0.813589	1.059	0.982643	0.774872	0.896634	0.999656	0.788288	0.912158	1.397
ENSMUSG00000030209	Grin2b	glutamate receptor, ionotropic, NMDA2B (epsilon 2)	yes	no	yes	transporter activity	channel activity	synaptic membrane	postsynaptic membrane	synaptosome	no	terminal button	amino acid binding	no	no	1.29	14132	0.909476	0.798853	1.02556	0.988339	11.7928	12.0942	12.0569	11.9163	6.30664	6.08237	5.53177	6.23068	6.81502	5.4442	5.80707	6.12961	0.982929	0.972941	0.95566	0.997841	0.987702	0.970158	0.991484	0.981409	0.963978	0.995261	1.00364	1.10135	1.00784	1.01633	1.11528	0.935454
ENSMUSG00000030302	Atp2b2	ATPase, Ca++ transporting, plasma membrane 2	yes	no	no	transporter activity	no	no	no	no	no	no	no	no	no	1.256	14123	0.985135	0.959506	1.03818	1.00009	11.4128	11.8485	11.4428	11.4438	12.0267	11.4305	11.2605	11.4064	11.4379	10.9748	11.3455	11.2064	1.02771	0.990776	0.982412	1.02354	0.986757	0.978427	1.02405	0.987245	0.978911	1.05773	1.02142	1.0452	1.04405	1.00821	1.03169	1.05353
ENSMUSG00000030465	Psd3	pleckstrin and Sec7 domain containing 3	no	no	yes	no	no	synaptic membrane	postsynaptic membrane	no	no	no	no	no	no	0.385	13044	0.979409	0.958762	1.06862	1.04527	11.6432	12.4421	11.7487	12.2806	10.9021	10.7357	10.5147	10.8652	11.0144	10.5602	10.6252	10.7873	0.975127	0.999609	0.969884	0.974497	0.998964	0.969258	1.00451	1.02973	0.999105	0.998529	1.00695	1.02786	1.00271	1.01117	1.03217	1.00084
ENSMUSG00000030500	Slc17a6	solute carrier family 17 (sodium-dependent inorganic phosphate cotransporter), member 6	no	no	yes	transporter activity	no	no	no	synaptosome	no	no	no	no	no	3.152	14262	0.953072	0.992149	1.12906	0.884212	6.76353	7.63643	7.24969	6.41026	8.96814	8.63817	8.23279	8.44074	8.4376	8.37136	8.43548	8.40448	0.861962	0.853711	0.915792	0.783618	0.776116	0.832555	1.10742	1.09682	1.17658	1.33501	1.31599	1.19712	0.8718	0.859382	0.781753	1.52147
ENSMUSG00000031144	Syp	synaptophysin	yes	no	yes	transporter activity	no	synaptic membrane	no	synaptosome	no	no	no	no	no	0.864	13929	1.00882	1.00174	1.00861	0.996295	14.1382	14.26	14.1807	14.1281	15.0765	14.5105	14.6384	15.1137	14.6547	14.6801	14.5745	14.6674	1.00087	0.989975	0.980833	1.00194	0.991043	0.981891	1.01954	1.00845	0.999137	1.00336	1.00604	1.02907	0.998144	1.00081	1.02372	0.998588
ENSMUSG00000031227	Magee1	melanoma antigen, family E, 1	no	no	yes	no	no	synaptic membrane	postsynaptic membrane	no	no	no	no	no	no	0.83	13905	1.10115	1.06422	1.03624	1.00582	9.94797	10.3085	9.99192	10.0501	11.5015	9.30698	10.2484	11.0348	9.77746	10.4053	9.77768	10.0914	1.00074	1.03348	0.960323	0.994823	1.02738	0.954649	1.0016	1.03437	0.961148	1.04756	1.05311	1.04294	1.02463	1.03006	1.02011	1.00409
ENSMUSG00000031355	Arhgap6	Rho GTPase activating protein 6	no	yes	no	no	no	no	no	no	SH3 domain binding	no	no	no	no	0.517	13483	1.20545	1.03601	0.80456	1.8196	3.87878	3.12071	2.20794	4.01758	5.67173	5.09833	6.14578	5.93294	6.00275	6.2189	5.62206	6.11083	1.12736	2.45528	1.60091	1.20473	2.62377	1.71076	1.46838	3.19797	2.08516	0.550027	0.977186	0.375577	1.08511	1.92782	0.740948	0.716403
ENSMUSG00000031393	Mecp2	methyl CpG binding protein 2	yes	no	no	no	no	no	no	no	no	no	no	no	no	0.609	13662	1.05217	1.00605	1.01767	1.03512	9.6393	9.80962	9.57454	9.91077	8.61838	8.3147	8.74849	8.73853	8.72956	8.78238	8.53159	8.75597	1.01941	1.03892	1.02183	0.996201	1.01527	0.998568	0.983384	1.00221	0.98572	1.00079	0.975588	0.996627	0.999094	0.973938	0.994942	0.999198
ENSMUSG00000031548	Sfrp1	secreted frizzled-related protein 1	no	yes	no	no	no	no	no	no	no	no	no	no	no	0.436	13239	1.04689	1.04219	0.701843	0.926485	6.16454	4.32654	5.77691	5.35222	7.08377	6.70395	7.01833	7.58631	6.86169	7.1512	6.86114	7.00644	0.998786	1.12926	1.0821	0.944497	1.06787	1.02328	1.05257	1.19007	1.14037	0.855862	0.653949	0.72342	0.810837	0.619547	0.685363	1.15598
ENSMUSG00000031555	Adam9	a disintegrin and metallopeptidase domain 9 (meltrin gamma)	no	yes	no	no	no	no	no	no	SH3 domain binding	no	no	no	no	0.325	12707	0.98274	0.986987	0.9985	1.02445	8.07503	8.06292	7.9286	8.12246	8.88699	8.98689	8.83178	8.73878	8.75485	8.64093	8.90934	8.69789	0.976325	1.01081	1.01568	0.9785	1.01306	1.01795	1.02637	1.06262	1.06775	1.00697	0.995611	0.963207	0.999088	0.987822	0.955671	1.02837
ENSMUSG00000031772	Cntnap4	contactin associated protein-like 4	no	yes	no	no	no	no	no	no	no	no	no	no	no	0.503	13456	1.00356	0.954468	0.869627	0.764364	6.60829	5.74675	6.70202	5.12279	7.52349	6.50565	6.52883	7.17453	6.80102	6.49135	6.51724	6.64618	1.00309	0.930667	1.02521	1.05153	0.975605	1.07471	0.958883	0.889648	0.980023	1.35873	1.03963	1.02229	1.19562	0.914824	0.89957	1.52456
ENSMUSG00000032011	Thy1	thymus cell antigen 1, theta	no	yes	no	no	no	no	no	no	no	no	no	no	no	0.578	13597	1.03097	1.02166	1.00655	0.975645	14.0864	14.1787	13.9988	13.6579	14.3838	14.222	14.6624	14.4745	14.1867	14.4941	14.4422	14.3404	1.01614	0.98659	0.995137	1.02539	0.995573	1.0042	1.02861	0.998696	1.00735	1.02797	1.04065	1.07867	1.02477	1.03741	1.07531	1.00021
ENSMUSG00000032076	Cadm1	cell adhesion molecule 1	no	yes	yes	no	no	no	no	synaptosome	no	no	no	no	no	0.317	12642	0.993261	0.96517	1.01517	1.04583	11.0755	11.2435	10.9617	11.4641	10.7728	10.4542	10.3837	10.7573	10.6551	10.284	10.419	10.4696	0.998975	0.992419	0.999917	1.03135	1.02458	1.03232	1.00654	0.999935	1.00749	0.976364	0.935721	0.959784	1.01279	0.970635	0.995595	1.01265
ENSMUSG00000032087	Dscaml1	Down syndrome cell adhesion molecule like 1	no	yes	no	no	no	no	no	no	no	no	no	no	no	0.284	12406	1.07347	0.981228	1.03019	1.00157	9.56525	9.85399	9.6504	9.66559	8.25393	7.11497	7.6377	8.11805	7.48398	7.3435	7.37634	7.41374	1.03917	0.983531	0.989176	1.05909	1.00238	1.00813	0.981439	0.928887	0.934218	1.04244	1.01512	1.04309	1.02355	0.996723	1.02418	1.0193
ENSMUSG00000032332	Col12a1	collagen, type XII, alpha 1	no	yes	no	no	no	no	no	no	no	no	no	no	no	0.291	12443	0.680207	0.90089	-8.59814	-0.121025	1.17907	-10.1378	-20.9988	2.54137	4.54393	6.45856	4.39316	3.9054	6.0808	5.47813	5.42586	5.77947	0.136953	-0.0141907	-0.0141907	0.257021	-0.0266318	-0.0266318	0.633659	-0.0656581	-0.0656581	-0.774127	-0.273871	-0.15656	4.00212	1.41587	0.80939	-38.2173
ENSMUSG00000032336	Nptn	neuroplastin	yes	yes	yes	no	no	synaptic membrane	no	no	no	no	no	no	no	1.135	14085	1.01008	1.00284	1.00759	0.982865	12.6535	12.7496	12.6842	12.4669	13.9835	13.8341	13.9736	13.8422	13.7383	13.7773	13.9039	13.7578	1.01221	0.998425	0.99588	1.0104	0.996641	0.9941	1.00026	0.986634	0.984119	1.02183	1.01392	1.07071	1.02141	1.0135	1.07027	0.986074
ENSMUSG00000032338	Hcn4	hyperpolarization-activated, cyclic nucleotide-gated K+ 4	no	no	yes	transporter activity	channel activity	no	no	no	no	terminal button	no	no	no	0.969	14009	-0.719757	-3.46437	1.06474	1.36578	3.44758	3.67079	2.76024	3.76987	4.86682	-4.69242	3.37741	3.51601	-0.707263	2.45022	-0.657508	0.87148	1.4978	1.06603	1.85104	1.40326	0.998749	1.7342	1.11352	0.792529	1.37613	1.16505	0.803266	0.947434	1.0534	0.726289	0.856642	1.36491
ENSMUSG00000032356	Rasgrf1	RAS protein-specific guanine nucleotide-releasing factor 1	yes	no	no	no	no	no	no	no	no	no	no	no	no	0.416	13160	1.08712	1.02566	1.02268	0.991383	13.3305	13.6329	13.5158	13.3993	12.1609	9.93123	10.7964	11.5388	10.4972	10.7665	10.3638	10.6318	1.01329	0.983175	0.97826	1.00394	0.9741	0.96923	1.00718	0.977243	0.972357	1.02086	1.01917	1.06688	1.01279	1.01111	1.05845	0.976447
ENSMUSG00000033060	Lmo7	LIM domain only 7	no	yes	no	no	no	no	no	no	no	no	no	no	no	0.278	12358	1.0373	1.00105	1.03995	1.00937	10.5199	10.9402	10.9402	11.0427	8.58758	7.43649	7.71386	7.81691	7.80838	7.81658	7.57517	7.81248	0.977634	0.982886	0.946672	0.967561	0.972759	0.936917	0.96586	0.971048	0.93527	0.998738	1.01127	1.03942	0.992353	1.00481	1.03277	0.930009
ENSMUSG00000033295	Ptprf	protein tyrosine phosphatase, receptor type, F	no	yes	no	no	no	no	no	no	no	no	no	no	no	0.275	12340	1.00845	0.969116	0.983185	1.0304	7.77107	7.6404	7.41755	7.64303	9.12036	8.44007	8.5114	8.88804	8.57727	8.31237	8.47573	8.44482	1.01527	1.03052	1.05525	1.09915	1.11567	1.14244	0.973357	0.987984	1.01169	0.998318	0.984063	0.982528	0.99479	0.980586	0.979056	1.03641
ENSMUSG00000033419	Snap91	synaptosomal-associated protein 91	no	no	yes	no	no	synaptic membrane	postsynaptic membrane	no	no	no	no	no	no	0.664	13746	1.08049	1.0376	1.02812	0.98998	10.8623	11.1677	11.3066	11.1933	12.0505	10.2202	11.0428	11.634	10.6312	11.0309	10.6315	10.831	0.972498	0.933965	0.922766	1.00438	0.964587	0.95302	0.996639	0.957151	0.945673	1.00418	0.996992	1.00674	0.996917	0.989781	0.999455	0.996705
ENSMUSG00000034187	Nsf	N-ethylmaleimide sensitive fusion protein	no	no	yes	no	no	no	no	no	no	no	no	no	no	0.841	13915	1.04073	1.00752	1.02262	0.999343	12.9379	13.2306	13.3655	13.3567	13.9117	12.2528	12.7519	13.6694	12.9749	13.0725	12.5023	13.0237	0.981661	0.968153	0.942013	0.986988	0.973406	0.947124	0.989627	0.976009	0.949657	0.991085	1.01447	0.994636	0.986968	1.01025	0.990504	0.967263
ENSMUSG00000034593	Myo5a	myosin VA	no	no	yes	no	no	no	no	no	no	no	no	no	no	0.81	13892	1.01902	0.980793	1.03328	1.0017	11.2689	11.644	11.17	11.1891	11.1631	9.88217	10.0701	10.5285	10.1075	9.91338	9.97613	10.0104	1.01273	1.00793	0.998694	1.01465	1.00984	1.00059	1.01817	1.01334	1.00405	1.04403	1.03733	1.03645	1.0272	1.0206	1.01973	1.0651
ENSMUSG00000034755	Pcdh11x	protocadherin 11 X-linked	no	yes	no	no	no	no	no	no	no	no	no	no	no	1.631	14194	0.881886	0.861562	0.963952	1.06962	6.85982	6.61254	7.05597	7.54718	6.0267	6.209	5.47563	5.56501	6.3701	5.48824	5.84231	5.92917	1.00146	0.939652	0.956443	1.02937	0.965836	0.983094	0.995485	0.934043	0.950734	0.915685	0.885581	0.799673	0.942751	0.911757	0.82331	0.926935
ENSMUSG00000035168	Tanc1	tetratricopeptide repeat, ankyrin repeat and coiled-coil containing 1	no	no	yes	no	no	synaptic membrane	postsynaptic membrane	no	no	no	no	no	no	0.363	12943	1.03578	1.0317	1.03606	1.00702	9.72709	10.0779	9.91926	9.9889	9.26247	7.65945	7.93349	8.62253	7.72598	7.97093	7.79647	7.84845	0.992478	0.990293	0.972789	1.01505	1.01281	0.994911	0.956364	0.954259	0.937392	1.0173	1.04976	1.01838	0.993883	1.0256	0.994936	0.983267
ENSMUSG00000035864	Syt1	synaptotagmin I	no	no	yes	transporter activity	no	synaptic membrane	no	no	no	no	no	no	no	0.757	13849	1.00519	0.985641	1.02053	0.982362	13.3347	13.6085	13.6279	13.3875	14.0705	13.385	13.4545	13.82	13.6429	13.447	13.4197	13.5449	0.999435	0.971606	0.968231	1.01185	0.983676	0.980259	0.983741	0.95635	0.953027	1.00823	1.02074	1.06156	1	1.01241	1.05289	0.977771
ENSMUSG00000036306	Lzts1	leucine zipper, putative tumor suppressor 1	yes	no	yes	no	no	synaptic membrane	postsynaptic membrane	synaptosome	no	no	no	no	no	0.628	13682	1.26451	1.14931	1.13752	1.03719	6.57007	7.47361	6.69515	6.94416	9.22712	6.38568	8.07477	8.50312	6.6188	7.60708	7.23023	7.11294	1.11061	0.939587	0.955152	1.14714	0.970487	0.986564	1.02454	0.866772	0.881131	1.03838	0.998239	1.08856	1.08549	1.04352	1.13794	1.09853
ENSMUSG00000037428	Vgf	VGF nerve growth factor inducible	yes	no	no	no	no	no	no	no	no	no	no	no	no	1.137	14088	1.03377	0.981545	1.01115	0.942738	9.87464	9.98475	9.88516	9.31912	12.2611	10.6812	11.0419	12.057	11.1519	10.9461	10.8616	11.049	1.00523	0.950662	1.01165	1.04572	0.98895	1.05239	0.996865	0.942747	1.00322	1.05153	1.04779	1.10801	1.01173	1.00813	1.06607	1.10023
ENSMUSG00000037892	Pcdh18	protocadherin 18	no	yes	no	no	no	no	no	no	no	no	no	no	no	0.452	13287	0.997879	0.979391	1.06992	0.957811	4.09578	4.38216	4.34186	4.15868	5.16766	4.63597	4.62613	5.28376	4.8046	4.70558	4.63105	4.75509	1.03594	0.995114	0.873017	1.11319	1.06932	0.938118	0.895589	0.860297	0.754741	1.11504	1.09248	1.01534	1.00884	0.988425	0.918633	1.16257
ENSMUSG00000037996	Slc24a2	solute carrier family 24 (sodium/potassium/calcium exchanger), member 2	yes	no	no	transporter activity	channel activity	no	no	no	no	no	no	no	no	1.803	14214	0.959824	0.949778	1.00848	0.973703	12.6951	12.8028	12.3775	12.052	10.8573	10.7116	10.2813	10.3803	10.6202	10.0868	10.4964	10.3535	1.03083	1.02475	1.02367	1.03958	1.03346	1.03237	1.0198	1.01379	1.01272	1.0601	1.05829	1.12261	1.03425	1.03249	1.09523	1.03519
ENSMUSG00000038257	Glra3	glycine receptor, alpha 3 subunit	no	no	yes	transporter activity	channel activity	synaptic membrane	postsynaptic membrane	no	no	no	amino acid binding	no	no	1.001	14028	-0.162499	-0.0431178	0.380841	0.404969	-20.9387	-7.97431	4.18867	1.69628	3.47357	-18.9059	3.07219	3.84159	-36.4859	1.57319	-7.91686	-17.4564	-8.45202	-7.1272	-8.35758	-8.45202	-7.1272	-8.35758	0.921682	0.777212	0.911383	1.67746	3.74219	6.27721	-11.1985	-24.9823	-41.9057	1.45641
ENSMUSG00000038418	Egr1	early growth response 1	yes	no	no	no	no	no	no	no	no	no	no	no	no	0.969	14008	1.05552	1.03606	0.997797	0.93765	12.3349	12.3077	12.5788	11.7946	13.0689	11.5854	12.2287	12.6589	12.0693	12.5045	11.907	12.2869	0.936996	0.953764	0.936979	1.00723	1.02525	1.00721	0.98037	0.997914	0.980351	0.997744	1.04963	1.15417	1.01974	1.07278	1.17962	0.920021
ENSMUSG00000039385	Cdh6	cadherin 6	no	yes	no	no	no	no	no	no	no	no	no	no	no	0.291	12458	1.15818	1.1173	1.07486	0.989047	6.82161	7.33227	6.78063	6.70636	6.02223	4.5858	5.31121	5.41972	4.34503	4.85469	4.94851	4.59986	1.00065	0.992439	1.00565	0.960591	0.95271	0.965394	1.06021	1.05151	1.06551	1.04126	1.11027	1.18698	0.94996	1.01292	1.0829	1.0866
ENSMUSG00000039542	Ncam1	neural cell adhesion molecule 1	no	yes	no	no	no	no	no	no	no	no	no	no	no	0.538	13533	1.01809	0.964836	0.983161	1.0128	11.6456	11.4495	11.4902	11.6372	11.591	10.4454	10.6344	11.2906	10.7366	10.359	10.5399	10.5478	1.01325	1.01867	1.0205	1.01498	1.02041	1.02225	0.999744	1.00509	1.0069	0.991996	0.977581	0.976237	0.990306	0.975915	0.974573	0.999679
ENSMUSG00000040265	Dnm3	dynamin 3	no	no	yes	no	no	no	no	no	no	no	no	no	no	1.212	14108	1.00207	0.993262	0.914455	0.943708	9.8771	9.03217	9.28332	8.76075	10.3492	9.25566	9.27483	9.778	9.38911	9.32585	9.26524	9.35748	1.07776	1.06032	1.08592	1.08324	1.06572	1.09144	1.04038	1.02356	1.04826	1.05541	1.01764	1.00483	1.04951	1.01194	0.999207	1.0782
ENSMUSG00000040640	Erc2	ELKS/RAB6-interacting/CAST family member 2	no	no	yes	no	no	synaptic membrane	no	synaptosome	no	terminal button	no	no	no	1.869	14220	1.051	0.978957	1.01386	1.05896	10.4574	10.6023	10.6326	11.2595	10.0825	9.10178	9.56598	10.1252	10.0109	9.80022	9.33388	9.90555	1.00501	1.01784	0.991416	1.01481	1.02777	1.00109	0.931827	0.943719	0.919222	0.968213	0.984535	0.970262	0.974457	0.990884	0.976519	0.864629
ENSMUSG00000040722	Scamp5	secretory carrier membrane protein 5	no	no	yes	no	no	no	no	no	no	no	no	no	no	0.739	13828	1.01282	0.988211	1.0085	0.993152	11.792	11.8923	11.7679	11.6873	12.6546	12.3883	12.547	12.7079	12.6138	12.4651	12.4676	12.5395	1.00561	0.998855	0.990323	1.01352	1.00671	0.998116	1.00927	1.00249	0.99393	1.02635	1.02598	1.05033	1.01169	1.01132	1.03532	0.991728
ENSMUSG00000040998	Npnt	nephronectin	no	yes	no	no	no	no	no	no	no	no	no	no	no	0.794	13880	0.959456	0.92653	0.977266	1.32994	5.31954	5.19861	4.66785	6.20796	8.28872	8.27503	7.93953	8.21689	8.63968	8.00492	8.10728	8.3223	1.05568	1.36017	1.46308	1.03885	1.33849	1.43976	0.751858	0.968722	1.04201	0.965778	1.00099	0.600542	0.956576	0.991454	0.59482	1.06971
ENSMUSG00000041075	Fzd7	frizzled homolog 7 (Drosophila)	no	yes	no	no	no	no	no	no	no	no	no	cell projection membrane	no	0.291	12448	0.889997	0.92837	0.829442	1.04997	5.02238	4.16577	4.67923	4.91304	6.04893	6.07669	5.40824	6.01174	5.84415	5.42553	5.74247	5.63484	0.87849	0.947804	1.26611	0.870745	0.939448	1.25494	1.06367	1.1476	1.533	0.770451	0.70108	0.633367	0.824379	0.750153	0.677701	1.21629
ENSMUSG00000041078	Grid1	glutamate receptor, ionotropic, delta 1	no	no	yes	transporter activity	channel activity	synaptic membrane	postsynaptic membrane	no	no	no	no	no	no	0.382	13032	1.062	1.06758	1.027	0.987991	7.53406	7.73747	7.82442	7.73045	8.98441	8.20791	8.71677	8.92339	8.00006	8.54075	8.46234	8.2704	0.99013	0.941087	0.93574	1.03639	0.98505	0.979454	0.968306	0.920344	0.915115	1.01805	0.970905	1.0227	1.05034	1.0017	1.05514	0.978379
ENSMUSG00000041444	Arhgap32	Rho GTPase activating protein 32	no	no	yes	no	no	synaptic membrane	postsynaptic membrane	no	no	no	no	no	no	0.274	12328	1.19572	1.12733	1.02883	0.990276	10.3537	10.6522	10.4114	10.3102	9.20274	6.65012	7.95165	8.61748	6.90553	7.78482	7.30089	7.34517	1.03066	0.989035	0.9862	1.0323	0.990609	0.987769	1.00709	0.966416	0.963646	1.05558	1.01004	1.06226	1.03171	0.987202	1.03824	1.0523
ENSMUSG00000041670	Rims1	regulating synaptic membrane exocytosis 1	yes	no	yes	no	no	synaptic membrane	no	no	SH3 domain binding	no	no	no	no	0.438	13255	0.937141	0.89384	0.98679	1.00926	9.60159	9.47475	9.54626	9.6347	10.4925	10.7224	10.0484	10.3312	11.3518	10.1467	10.3854	10.7492	1.02066	1.0045	0.987605	1.04292	1.02641	1.00914	1.00365	0.987759	0.971145	0.998254	0.976503	0.97971	1.00598	0.984061	0.987293	0.98648
ENSMUSG00000043313	Pcdhb19	protocadherin beta 19	no	yes	no	no	no	no	no	no	no	no	no	no	no	0.452	13296	1.12653	1.07638	1.09923	0.925013	5.45821	5.99985	6.02361	5.57192	4.53636	3.5718	4.02372	4.14395	3.45761	3.72171	3.79776	3.58966	0.932845	0.897654	0.866745	0.971174	0.934538	0.902359	0.919017	0.884348	0.853898	1.04204	1.17869	1.11033	1.04822	1.18568	1.11691	0.94908
ENSMUSG00000044043	Pcdhb14	protocadherin beta 14	no	yes	no	no	no	no	no	no	no	no	no	no	no	0.307	12570	1.07605	0.969941	1.06313	0.997086	6.8024	7.23187	7.2607	7.23954	5.83071	4.66686	5.02175	5.35398	4.78193	4.63819	4.84431	4.71006	0.972624	0.955291	0.906994	0.96473	0.947537	0.899632	0.958076	0.941002	0.893427	1.03836	1.01428	1.0022	1.04275	1.01857	1.00644	0.975467
ENSMUSG00000045038	Prkce	protein kinase C, epsilon	no	yes	no	no	no	no	no	no	SH3 domain binding	no	no	no	no	0.352	12862	1.05802	1.03026	1.03814	1.01864	11.8898	12.3432	12.0867	12.3119	11.6977	10.9257	11.5596	11.6357	11.1269	11.4636	11.2427	11.2953	1.01047	0.976734	0.962047	1.00499	0.971437	0.95683	1.01916	0.98514	0.970327	1.0247	1.00125	1.01005	1.01278	0.989606	0.998305	1.00816
ENSMUSG00000045062	Pcdhb7	protocadherin beta 7	no	yes	no	no	no	no	no	no	no	no	no	no	no	0.969	14007	1.00813	0.975571	1.05503	0.985803	6.21584	6.55788	6.74607	6.65029	6.93701	6.17742	6.22764	6.78305	6.34881	6.19371	6.20253	6.27126	0.967315	0.935171	0.906421	0.901683	0.871719	0.84492	0.988777	0.95592	0.926532	1.02794	1.03786	1.04238	0.983829	0.993319	0.997642	0.923463
ENSMUSG00000045498	Pcdhb3	protocadherin beta 3	no	yes	no	no	no	no	no	no	no	no	no	no	no	0.743	13836	1.00762	0.979247	1.08377	0.97223	7.02627	7.61485	7.65503	7.44245	7.31192	6.42307	6.47201	6.85078	6.71049	6.57123	6.44754	6.64086	0.874703	0.9138	0.89853	0.877028	0.916228	0.900918	0.938249	0.980185	0.963806	1.00785	1.03585	1.07648	1.01132	1.03942	1.08018	0.957436
ENSMUSG00000045689	Pcdhb4	protocadherin beta 4	no	yes	no	no	no	no	no	no	no	no	no	no	no	0.84	13914	2.19515	1.05115	1.06837	0.974445	6.22754	6.65334	6.38642	6.22321	4.54719	1.61044	3.53515	3.94616	3.18676	3.34974	2.57279	3.26825	1.01455	0.997636	0.920396	1.06248	1.04477	0.963882	0.96462	0.94854	0.875102	1.03061	1.0097	1.24696	1.02274	1.00199	1.23744	0.990651
ENSMUSG00000046159	Chrm3	cholinergic receptor, muscarinic 3, cardiac	no	no	yes	no	no	synaptic membrane	postsynaptic membrane	no	no	no	no	no	no	0.705	13794	1.13172	1.0691	1.06684	0.921391	8.46858	9.03458	9.17466	8.45346	8.3289	6.92555	7.83782	8.47078	7.41429	7.92659	7.38169	7.67044	0.948821	0.924664	0.906067	0.939263	0.91535	0.89694	0.948704	0.92455	0.905955	1.03116	1.02064	1.27776	1.00609	0.995818	1.24669	0.973743
ENSMUSG00000046447	Camk2n1	calcium/calmodulin-dependent protein kinase II inhibitor 1	no	no	yes	no	no	synaptic membrane	postsynaptic membrane	synaptosome	no	no	no	no	no	0.755	13848	0.874535	0.896968	1.02301	1.05803	11.5779	11.8443	11.1616	11.8094	12.8055	15.5896	13.6337	13.1561	15.4889	13.8931	14.6116	14.691	1.03823	1.06882	1.00369	1.0214	1.0515	0.987423	1.05826	1.08944	1.02305	1.03407	0.988002	1.00203	1.02664	0.9809	0.994828	1.02702
ENSMUSG00000048218	Amigo2	adhesion molecule with Ig like domain 2	no	yes	no	no	no	no	no	no	no	no	no	no	no	0.399	13102	1.01692	0.966298	0.861	1.29318	3.57847	3.08106	3.51653	4.54752	7.07277	7.07267	7.19237	7.40292	7.42923	7.17885	7.13252	7.30404	0.788657	1.15786	0.78388	0.896359	1.31598	0.89093	1.04954	1.54087	1.04318	1.16859	0.875563	0.635699	0.551214	0.412995	0.299853	1.10748
ENSMUSG00000048347	Pcdhb18	protocadherin beta 18	no	yes	no	no	no	no	no	no	no	no	no	no	no	1.631	14195	0.94836	0.899273	1.11889	0.983773	5.47101	6.12143	5.87818	5.78279	5.58142	5.22838	4.95838	5.03614	5.12366	4.60757	5.09338	4.86561	0.958257	0.957188	0.912595	0.918185	0.91716	0.874432	0.963365	0.96229	0.917459	1.10216	1.08313	1.10066	1.0272	1.00947	1.0258	1.06636
ENSMUSG00000049583	Grm5	glutamate receptor, metabotropic 5	yes	no	yes	no	no	no	no	no	no	no	no	no	no	0.431	13224	0.982192	0.998372	1.04067	0.989075	10.7853	11.2239	11.247	11.1241	9.80384	9.28724	9.12186	9.65833	9.22588	9.21086	9.20455	9.21837	0.994289	0.957829	0.938773	1.00615	0.969253	0.94997	0.969623	0.934068	0.915485	0.996855	1.01544	1.04458	1.00229	1.02098	1.05028	0.963215
ENSMUSG00000049612	Omg	oligodendrocyte myelin glycoprotein	no	yes	no	no	no	no	no	no	no	no	no	no	no	0.324	12703	0.945264	0.94034	1.00825	0.982833	11.9911	12.09	11.8588	11.6552	11.1597	11.6979	11.0576	10.77	11.5656	10.8756	11.3778	11.2206	0.990417	0.978654	0.976606	1.00725	0.995284	0.993201	1.06227	1.04965	1.04745	1.03491	1.00799	1.06816	1.04075	1.01367	1.07419	1.03168
ENSMUSG00000050272	Dscam	Down syndrome cell adhesion molecule	no	yes	no	no	no	no	no	no	no	no	no	no	no	1.201	14104	1.09978	1.05163	1.04219	1.00074	8.58096	8.94302	8.6306	8.63698	8.43094	7.29819	8.02643	8.19707	7.43061	7.81424	7.66231	7.62243	1.03956	0.996326	1.017	0.991194	0.949967	0.969675	1.0172	0.974893	0.995118	1.05057	1.03286	1.05084	1.00421	0.98728	1.00447	1.06901
ENSMUSG00000050556	Kcnb1	potassium voltage gated channel, Shab-related subfamily, member 1	no	no	yes	transporter activity	channel activity	synaptic membrane	postsynaptic membrane	no	no	no	no	cell projection membrane	no	0.59	13617	1.05393	1.04331	1.03897	1.00098	10.0371	10.4283	9.90008	9.9098	8.43483	7.90158	8.32769	8.24381	7.71871	8.05299	8.11463	7.88585	1.04399	1.01206	1.02143	1.05167	1.01951	1.02895	1.00024	0.969656	0.978638	1.05868	1.03334	1.10641	1.029	1.00437	1.07539	1.04971
ENSMUSG00000050761	Gp1bb	glycoprotein Ib, beta polypeptide	no	yes	no	no	no	no	no	no	no	no	no	no	no	2.772	14258	0.950279	0.897948	0.881475	1.59175	5.528	4.87279	3.656	5.81944	5.81471	7.08173	6.72962	6.21628	6.51599	5.85103	6.90568	6.18351	4.95488	1.09223	1.12813	6.11798	1.34862	1.39294	3.93955	0.868418	0.896958	1.1361	0.834422	0.715961	0.889181	0.653068	0.560354	1.2808
ENSMUSG00000051177	Plcb1	phospholipase C, beta 1	no	yes	no	no	no	no	no	no	no	no	no	no	no	0.9	13957	1.11094	1.08338	1.03061	0.984679	10.6894	11.0167	11.1033	10.9331	12.02	9.65871	10.7302	11.5095	10.073	10.913	10.1945	10.493	0.992875	0.950077	0.938554	0.998543	0.955501	0.943913	0.995855	0.952929	0.941371	1.01165	1.00645	1.04122	0.998826	0.993693	1.02802	0.989031
ENSMUSG00000051391	Ywhag	tyrosine 3-monooxygenase/tryptophan 5-monooxygenase activation protein, gamma polypeptide	yes	no	no	no	no	no	no	no	no	no	no	no	no	0.656	13726	1.09687	1.07867	1.02546	0.989807	12.8153	13.1416	13.0329	12.9	14.4071	12.9432	14.1971	14.4376	13.1972	14.2354	13.5702	13.7163	0.987674	0.982177	0.966306	0.993189	0.987662	0.971703	0.996308	0.990763	0.974754	1.00781	1.02607	1.03825	0.998529	1.01662	1.02869	1.00185
ENSMUSG00000051599	Pcdhb2	protocadherin beta 2	no	yes	no	no	no	no	no	no	no	no	no	no	no	0.759	13854	1.36724	-0.379114	1.0418	0.977059	7.2503	7.55339	7.62088	7.44605	4.3418	2.63972	3.60913	3.93788	-8.50165	3.2231	3.12442	-2.63928	1.00379	0.977483	0.94956	0.956415	0.931352	0.904747	0.973846	0.948326	0.921236	1.03087	1.00058	1.0999	1.03299	1.00264	1.10216	0.946435
ENSMUSG00000051678	Pcdhb6	protocadherin beta 6	no	yes	no	no	no	no	no	no	no	no	no	no	no	1.05	14055	1.56112	0.959927	1.01268	0.930186	7.07506	7.1648	7.33382	6.82181	5.63313	3.05834	4.77443	5.11768	4.66448	4.47756	3.91638	4.57102	1.02744	0.955599	1.02346	1.00485	0.934592	1.00096	0.938135	0.872537	0.934502	0.975368	0.999487	1.25065	0.975872	1	1.25129	0.943072
ENSMUSG00000052613	Pcdh15	protocadherin 15	no	yes	no	no	no	no	no	no	no	no	no	no	no	0.355	12893	-1.66434	1.03416	0.924665	1.04855	7.27116	6.72339	6.82349	7.1548	5.44289	-3.12913	5.20793	5.51573	4.88378	5.05061	1.0394	4.96719	1.04547	1.13176	1.11908	1.10459	1.19576	1.18236	0.89542	0.969327	0.958467	0.866473	0.858559	0.792307	1.00264	0.993487	0.916823	1.04662
ENSMUSG00000052727	Mtap1b	microtubule-associated protein 1B	no	no	yes	no	no	no	no	no	no	no	no	no	no	0.368	12966	1.14967	1.06685	1.011	0.99652	13.1655	13.3104	13.1454	13.0997	10.7979	8.3891	9.64468	10.206	8.8269	9.41696	9.01689	9.12193	1.00371	0.993929	0.985839	1.02374	1.01377	1.00552	1.00515	0.995355	0.987254	1.01781	1.0202	1.0135	1.00542	1.00778	1.00116	1.02697
ENSMUSG00000055022	Cntn1	contactin 1	no	yes	no	no	no	no	no	no	no	no	no	no	no	0.277	12348	0.974627	0.96701	1.01093	0.999575	11.5878	11.7145	11.7024	11.6975	11.5402	11.1817	10.898	11.2253	11.2611	10.8896	11.0399	11.0754	0.994794	0.983267	0.969007	1.00685	0.995188	0.980755	1.00693	0.995258	0.980824	1.00493	1.00204	1.00112	1.00854	1.00564	1.00471	0.997589
ENSMUSG00000055026	Gabrg3	gamma-aminobutyric acid (GABA) A receptor, subunit gamma 3	no	no	yes	transporter activity	channel activity	synaptic membrane	postsynaptic membrane	no	no	no	no	no	GABA receptor activity	0.753	13845	0.978564	0.944031	1.02587	0.952182	8.71793	8.94344	9.03634	8.60424	7.27495	7.48828	7.32776	7.13679	7.59446	7.16941	7.40802	7.38194	0.991682	0.960419	0.985885	1.01482	0.982824	1.00888	0.924869	0.895711	0.919462	1.05746	0.995347	1.15074	1.00247	0.943594	1.09091	1.03894
ENSMUSG00000058589	Anks1b	ankyrin repeat and sterile alpha motif domain containing 1B	no	no	yes	no	no	synaptic membrane	postsynaptic membrane	no	no	no	no	no	no	0.311	12608	1.01567	1.00337	1.02405	0.995312	12.2208	12.5148	12.5315	12.4728	11.0713	11.0868	11.2606	10.9213	11.0155	11.0526	11.1737	11.0341	0.981267	0.947376	0.953024	0.993405	0.959095	0.964813	1.01474	0.97969	0.98553	1.00323	0.979806	1.03395	1.01013	0.986544	1.04106	0.99092
ENSMUSG00000059602	Syn3	synapsin III	no	no	yes	no	no	no	no	no	no	no	no	no	no	0.283	12401	1.72941	1.36956	1.05981	1.00241	9.39326	9.95508	9.18682	9.209	7.0395	3.24703	5.61545	6.31852	3.88483	5.32051	4.43124	4.60267	1.06684	0.988882	1.07198	1.05802	0.9807	1.06311	1.01826	0.943849	1.02317	1.12823	1.0755	1.06458	1.11944	1.06713	1.0563	1.113
ENSMUSG00000059674	Cdh24	cadherin-like 24	no	yes	no	no	no	no	no	no	no	no	no	no	no	0.565	13585	1.04816	1.03517	1.16252	1.07985	6.04376	7.026	6.03915	6.52135	5.85819	5.5172	5.7829	5.88671	5.32183	5.509	5.65005	5.41542	0.980105	0.941714	1.00202	1.06288	1.02124	1.08664	0.978225	0.939908	1.0001	1.04924	1.04415	1.11937	0.990204	0.985401	1.05638	1.13046
ENSMUSG00000059974	Ntm	neurotrimin	no	yes	no	no	no	no	no	no	no	no	no	no	no	0.283	12403	0.990432	0.966006	1.01853	1.04136	11.7115	11.9285	11.3649	11.835	11.9436	11.6728	11.5611	11.8939	11.9284	11.5229	11.617	11.7256	1.02098	1.04159	1.00115	1.04898	1.07016	1.0286	1.02155	1.04217	1.0017	0.984361	0.977046	1.0277	1.00299	0.995535	1.04715	1.00141
ENSMUSG00000060882	Kcnd2	potassium voltage-gated channel, Shal-related family, member 2	no	no	yes	transporter activity	channel activity	no	no	synaptosome	no	no	no	no	no	0.587	13610	1.02056	1.03996	1.03682	0.991351	10.0123	10.381	10.4553	10.3649	10.057	9.41835	9.61194	9.91189	9.39168	9.76701	9.51514	9.57934	0.990586	0.969687	0.930194	0.96862	0.948185	0.909568	0.996486	0.975463	0.935735	1.00483	0.997732	1.0852	1.0115	1.00436	1.09241	0.921273
ENSMUSG00000061665	Cd2ap	CD2-associated protein	no	yes	no	no	no	no	no	no	SH3 domain binding	no	no	no	no	0.387	13051	0.889488	0.932839	0.994277	1.05596	6.98358	6.94362	6.74088	7.11807	5.75664	6.92789	6.16227	5.89965	6.7202	6.26887	6.54508	6.49453	1.00357	1.11255	1.03046	0.992167	1.09991	1.01876	0.983756	1.09059	1.01012	1.00661	0.947555	0.931619	1.02772	0.967422	0.951151	1.03147
ENSMUSG00000062209	Erbb4	v-erb-a erythroblastic leukemia viral oncogene homolog 4 (avian)	no	no	yes	no	no	no	no	no	no	no	no	no	no	0.893	13950	0.989341	0.982874	0.971147	1.00071	8.75256	8.50002	8.58692	8.59298	7.89596	7.47569	7.39601	7.69224	7.46899	7.34108	7.43585	7.40504	1.02215	0.999688	1.016	1.04009	1.01724	1.03384	1.0247	1.00218	1.01854	1.01258	0.968223	0.976405	0.97689	0.934095	0.941988	1.06004
ENSMUSG00000063142	Kcnma1	potassium large conductance calcium-activated channel, subfamily M, alpha member 1	no	no	yes	transporter activity	channel activity	synaptic membrane	postsynaptic membrane	no	no	terminal button	no	no	no	0.332	12742	1.08368	0.969068	1.03958	1.00753	9.89668	10.2884	10.0865	10.1624	7.53771	6.81989	7.39058	7.44379	7.12724	6.90678	7.10524	7.01701	0.998758	0.983983	0.971426	1.00984	0.994898	0.982202	0.977282	0.962825	0.950538	1.00501	1.00836	1.0522	1.01095	1.01432	1.05842	0.972458
ENSMUSG00000063260	Syt10	synaptotagmin X	no	no	yes	transporter activity	no	no	no	no	no	no	no	no	no	1.001	14029	-0.394418	1.3551	0.631097	1.11359	5.57635	3.51921	5.79452	6.45269	3.50865	-11.6985	4.61412	4.68891	3.24746	4.40063	-3.54221	3.82404	0.785554	0.897445	1.04835	0.910544	1.04024	1.21515	0.829729	0.947912	1.1073	0.548916	0.590292	0.393359	0.707875	0.761233	0.507271	0.556819
ENSMUSG00000063687	Pcdhb5	protocadherin beta 5	no	yes	no	no	no	no	no	no	no	no	no	no	no	1.098	14074	1.14551	1.00541	1.04631	0.960235	6.41305	6.71003	6.57185	6.31052	6.32064	4.73181	5.42034	5.76296	5.29943	5.32808	5.07608	5.31375	0.993056	0.963949	0.920809	1.0384	1.00797	0.962857	1.00208	0.97271	0.929178	1.04798	1.04041	1.20223	1.05462	1.047	1.20985	0.958631
ENSMUSG00000063887	Nlgn1	neuroligin 1	no	yes	yes	no	no	synaptic membrane	postsynaptic membrane	no	no	no	no	no	no	0.943	13995	0.990217	0.995473	1.04088	1.00033	9.86503	10.2684	10.2794	10.2828	9.11717	8.81258	8.72636	8.81034	8.59134	8.55245	8.76947	8.57189	0.981006	0.967395	0.930583	0.974096	0.96058	0.924027	0.98947	0.975741	0.938611	1.01114	1.01906	1.03932	1.0164	1.02436	1.04473	0.9334
ENSMUSG00000064293	Cntn4	contactin 4	no	yes	no	no	no	no	no	no	no	no	no	no	no	0.836	13910	1.05545	0.99032	1.05681	0.944926	8.06822	8.52661	8.73042	8.2496	7.7653	6.65896	7.02821	7.22746	6.91759	6.85063	6.84358	6.88411	0.903902	0.882975	0.873205	0.942575	0.920753	0.910565	0.980362	0.957665	0.947069	1.00435	0.959358	1.13936	0.99629	0.95166	1.13022	1.02609
ENSMUSG00000066392	Nrxn3	neurexin III	no	yes	yes	no	no	synaptic membrane	no	no	no	no	no	no	no	0.418	13169	1.05451	1.0066	1.01032	0.979933	12.5711	12.7009	12.4428	12.1932	10.684	9.66486	10.1917	10.3258	9.90826	9.97362	9.92826	9.94094	1.03531	1.02451	1.0128	1.03205	1.02129	1.00962	0.99667	0.986273	0.975004	1.04283	1.00197	1.10526	1.02765	0.987386	1.08917	1.03808
ENSMUSG00000070047	Fat1	FAT tumor suppressor homolog 1 (Drosophila)	no	yes	no	no	no	no	no	no	no	no	no	no	no	0.339	12814	1.06233	0.986161	0.946614	0.996434	8.30225	7.85902	7.88563	7.85751	8.40083	7.05145	7.49098	7.97818	7.42581	7.32304	7.27122	7.37443	1.05592	1.06479	1.1011	1.03824	1.04696	1.08267	1.01237	1.02087	1.05568	1.01218	0.98859	0.974475	1.01306	0.989449	0.975322	1.0379
ENSMUSG00000070570	Slc17a7	solute carrier family 17 (sodium-dependent inorganic phosphate cotransporter), member 7	no	no	yes	transporter activity	no	no	no	synaptosome	no	no	no	no	no	1.227	14110	1.00443	0.979271	1.03694	0.997074	12.7136	13.1832	13.0135	12.9754	14.0014	14.0941	14.1565	14.3654	14.5007	14.2001	14.1253	14.3504	0.997226	0.94782	0.950602	1.01217	0.962019	0.964843	1.02031	0.969764	0.97261	1.02305	0.99243	1.04784	1.02502	0.994342	1.04986	1.00728
ENSMUSG00000070695	Cntnap5a	contactin associated protein-like 5A	no	yes	no	no	no	no	no	no	no	no	no	no	no	0.404	13127	1.10451	0.947813	1.07961	1.02687	7.81611	8.43838	8.04095	8.25702	6.17166	5.18526	5.72718	5.74697	5.62274	5.32931	5.45622	5.47603	0.994142	0.983819	0.951424	0.964334	0.954319	0.922896	1.01148	1.00098	0.968018	1.03914	1.00791	0.964927	1.03789	1.0067	0.963772	1.09912
ENSMUSG00000073591	Pcdhb22	protocadherin beta 22	no	yes	no	no	no	no	no	no	no	no	no	no	no	0.339	12799	0.984798	0.905572	1.08991	0.921157	5.62536	6.13114	6.15704	5.6716	5.79652	5.0825	5.00524	5.37798	5.32692	4.82391	5.04387	5.07542	0.915893	0.920773	0.923397	0.850943	0.855477	0.857915	0.961838	0.966963	0.969719	1.01754	1.08727	1.10091	1.07027	1.1436	1.15796	1.00407
																		na	na	na	na
																		na	na	na	na
																		na	na	na	na
																		na	na	na	na
																		na	na	na	na
																		na	na	na	na
																		na	na	na	na
																		na	na	na	na
																		na	na	na	na
																		na	na	na	na
																		na	na	na	na
																		na	na	na	na
																		na	na	na	na
																		na	na	na	na
																		na	na	na	na
																		na	na	na	na
																		na	na	na	na
																		na	na	na	na
																		na	na	na	na
																		na	na	na	na
																		na	na	na	na
																		na	na	na	na
																		na	na	na	na
																		na	na	na	na
																		na	na	na	na
																		na	na	na	na
																		na	na	na	na
																		na	na	na	na
																		na	na	na	na
																		na	na	na	na
																		na	na	na	na
																		na	na	na	na
																		na	na	na	na
																		na	na	na	na
																		na	na	na	na
																		na	na	na	na
																		na	na	na	na
																		na	na	na	na
																		na	na	na	na
																		na	na	na	na
																		na	na	na	na
																		na	na	na	na
																		na	na	na	na
																		na	na	na	na
																		na	na	na	na
																		na	na	na	na
																		na	na	na	na
																		na	na	na	na
																		na	na	na	na
																		na	na	na	na
																		na	na	na	na
																		na	na	na	na
																		na	na	na	na
																		na	na	na	na
																		na	na	na	na
																		na	na	na	na
																		na	na	na	na
																		na	na	na	na
																		na	na	na	na
																		na	na	na	na
																		na	na	na	na
																		na	na	na	na
																		na	na	na	na
																		na	na	na	na
																		na	na	na	na
																		na	na	na	na
																		na	na	na	na
																		na	na	na	na
																		na	na	na	na
																		na	na	na	na
																		na	na	na	na
																		na	na	na	na
																		na	na	na	na
																		na	na	na	na
																		na	na	na	na
																		na	na	na	na
																		na	na	na	na
																		na	na	na	na
																		na	na	na	na
																		na	na	na	na
																		na	na	na	na
																		na	na	na	na
																		na	na	na	na
																		na	na	na	na
																		na	na	na	na
																		na	na	na	na
																		na	na	na	na
																		na	na	na	na
																		na	na	na	na
																		na	na	na	na
																		na	na	na	na
																		na	na	na	na
																		na	na	na	na
																		na	na	na	na
																		na	na	na	na
																		na	na	na	na
																		na	na	na	na
																		na	na	na	na
																		na	na	na	na
																		na	na	na	na
																		na	na	na	na
																		na	na	na	na
																		na	na	na	na
																		na	na	na	na
																		na	na	na	na
																		na	na	na	na
																		na	na	na	na
																		na	na	na	na
																		na	na	na	na
																		na	na	na	na
																		na	na	na	na
																		na	na	na	na
																		na	na	na	na
																		na	na	na	na
																		na	na	na	na
																		na	na	na	na
																		na	na	na	na
																		na	na	na	na
																		na	na	na	na
																		na	na	na	na
																		na	na	na	na
																		na	na	na	na
																		na	na	na	na
																		na	na	na	na
																		na	na	na	na
																		na	na	na	na
																		na	na	na	na
																		na	na	na	na
																		na	na	na	na
																		na	na	na	na
																		na	na	na	na
																		na	na	na	na
																		na	na	na	na
																		na	na	na	na
																		na	na	na	na
																		na	na	na	na
																		na	na	na	na
																		na	na	na	na
																		na	na	na	na
																		na	na	na	na
																		na	na	na	na
																		na	na	na	na
																		na	na	na	na
																		na	na	na	na
																		na	na	na	na
																		na	na	na	na
																		na	na	na	na
																		na	na	na	na
																		na	na	na	na
																		na	na	na	na
																		na	na	na	na
																		na	na	na	na
																		na	na	na	na
																		na	na	na	na
																		na	na	na	na
																		na	na	na	na
																		na	na	na	na
																		na	na	na	na
																		na	na	na	na
																		na	na	na	na
																		na	na	na	na
																		na	na	na	na
																		na	na	na	na
																		na	na	na	na
																		na	na	na	na
																		na	na	na	na
																		na	na	na	na
																		na	na	na	na
																		na	na	na	na
																		na	na	na	na
																		na	na	na	na
																		na	na	na	na
																		na	na	na	na
																		na	na	na	na
																		na	na	na	na
																		na	na	na	na
																		na	na	na	na
																		na	na	na	na
																		na	na	na	na
																		na	na	na	na
																		na	na	na	na
																		na	na	na	na
																		na	na	na	na
																		na	na	na	na
																		na	na	na	na
																		na	na	na	na
																		na	na	na	na
																		na	na	na	na
																		na	na	na	na
																		na	na	na	na
																		na	na	na	na
																		na	na	na	na
																		na	na	na	na
																		na	na	na	na
																		na	na	na	na
																		na	na	na	na
																		na	na	na	na
																		na	na	na	na
																		na	na	na	na
																		na	na	na	na
																		na	na	na	na
																		na	na	na	na
																		na	na	na	na
																		na	na	na	na
																		na	na	na	na
																		na	na	na	na
																		na	na	na	na
																		na	na	na	na
																		na	na	na	na
																		na	na	na	na
																		na	na	na	na
																		na	na	na	na
																		na	na	na	na
																		na	na	na	na
																		na	na	na	na
																		na	na	na	na
																		na	na	na	na
																		na	na	na	na
																		na	na	na	na
																		na	na	na	na
																		na	na	na	na
																		na	na	na	na
																		na	na	na	na
																		na	na	na	na
																		na	na	na	na
																		na	na	na	na
																		na	na	na	na
																		na	na	na	na
																		na	na	na	na
																		na	na	na	na
																		na	na	na	na
																		na	na	na	na
																		na	na	na	na
																		na	na	na	na
																		na	na	na	na
																		na	na	na	na
																		na	na	na	na
																		na	na	na	na
																		na	na	na	na
																		na	na	na	na
																		na	na	na	na
																		na	na	na	na
																		na	na	na	na
																		na	na	na	na
																		na	na	na	na
																		na	na	na	na
																		na	na	na	na
																		na	na	na	na
																		na	na	na	na
																		na	na	na	na
																		na	na	na	na
																		na	na	na	na
																		na	na	na	na
																		na	na	na	na
																		na	na	na	na
																		na	na	na	na
																		na	na	na	na
																		na	na	na	na
																		na	na	na	na
																		na	na	na	na
																		na	na	na	na
																		na	na	na	na
																		na	na	na	na
																		na	na	na	na
																		na	na	na	na
																		na	na	na	na
																		na	na	na	na
																		na	na	na	na
																		na	na	na	na
																		na	na	na	na
																		na	na	na	na
																		na	na	na	na
																		na	na	na	na
																		na	na	na	na
																		na	na	na	na
																		na	na	na	na
																		na	na	na	na
																		na	na	na	na
																		na	na	na	na
																		na	na	na	na
																		na	na	na	na
																		na	na	na	na
																		na	na	na	na
[truncated: 44 more columns]

## Sheet: for Table 2
		Polysomes		Neuronal axis
Category	Direction	Celf4 null poly/mono	wildtype poly/mono	Celf4 null np/cb	wildtype np/cb
Reg. synaptic plasticity	>1	16	13	19	7
	<1	5	8	2	14
Cell adhesion	>1	41	23	44	31
	<1	25	43	22	35
Synapse part	>1	38	29	56	30
	<1	30	39	12	38
Transporter activity	>1	7	6	22	9
	<1	18	19	3	16
Channel activity	>1	4	4	14	6
	<1	12	12	2	10
Synaptic membrane	>1	20	18	33	18
	<1	18	20	5	20
Postsynaptic membrane	>1	14	14	26	15
	<1	16	16	4	15

## Sheet: 142 list by GO category
		68	65	62	56	47	40	39	38	38	35	35	31	30	30	28	28	28	27	27	26	25	24	24	24	24	24	22	22	22	21	21	21	21	20	20	20	20	19	19	19	18	17	17	16	16	16	16	16
Ensembl ID	unique list	synapse	cell projection	cytoplasmic part	neuron projection	cell junction	cell projection part	plasma membrane part	dendrite	synaptic membrane	intracellular non-membrane-bounded organelle	non-membrane-bounded organelle	receptor binding	cytoskeleton	postsynaptic membrane	cell body	cytoplasmic vesicle	vesicle	cytoplasmic membrane-bounded vesicle	membrane-bounded vesicle	neuronal cell body	transporter activity	axon	cell fraction	cytoskeletal part	enzyme binding	protein domain specific binding	dendritic spine	insoluble fraction	neuron spine	membrane fraction	substrate-specific transmembrane transporter activity	substrate-specific transporter activity	transmembrane transporter activity	clathrin-coated vesicle	coated vesicle	dendritic spine head	postsynaptic density	intrinsic to plasma membrane	ion transmembrane transporter activity	synaptic vesicle	protein dimerization activity	identical protein binding	kinase binding	channel activity	cytosol	endomembrane system	integral to plasma membrane	ion channel activity
ENSMUSG00000000127	Fer	no	cell projection	no	no	cell junction	no	plasma membrane part	no	no	intracellular non-membrane-bounded organelle	non-membrane-bounded organelle	receptor binding	cytoskeleton	no	no	no	no	no	no	no	no	no	no	no	no	no	no	no	no	no	no	no	no	no	no	no	no	no	no	no	no	no	no	no	no	no	no	no
ENSMUSG00000000560	Gabra2	synapse part	cell projection	cytoplasmic part	neuron projection	cell junction	no	no	no	synaptic membrane	no	no	no	no	postsynaptic membrane	no	cytoplasmic vesicle	vesicle	cytoplasmic membrane-bounded vesicle	membrane-bounded vesicle	no	transporter activity	axon	no	no	no	no	no	no	no	no	substrate-specific transmembrane transporter activity	substrate-specific transporter activity	transmembrane transporter activity	clathrin-coated vesicle	coated vesicle	no	no	no	ion transmembrane transporter activity	synaptic vesicle	no	no	no	channel activity	no	endomembrane system	no	ion channel activity
ENSMUSG00000000567	Sox9	no	no	no	no	no	no	no	no	no	no	no	no	no	no	no	no	no	no	no	no	no	no	no	no	enzyme binding	no	no	no	no	no	no	no	no	no	no	no	no	no	no	no	no	no	kinase binding	no	no	no	no	no
ENSMUSG00000001986	Gria3	synapse part	cell projection	no	neuron projection	cell junction	cell projection part	plasma membrane part	dendrite	synaptic membrane	intracellular non-membrane-bounded organelle	non-membrane-bounded organelle	no	cytoskeleton	postsynaptic membrane	cell body	no	no	no	no	neuronal cell body	transporter activity	axon	no	cytoskeletal part	no	protein domain specific binding	dendritic spine	no	neuron spine	no	substrate-specific transmembrane transporter activity	substrate-specific transporter activity	transmembrane transporter activity	no	no	dendritic spine head	postsynaptic density	intrinsic to plasma membrane	ion transmembrane transporter activity	no	no	no	no	channel activity	no	no	integral to plasma membrane	ion channel activity
ENSMUSG00000002808	Epdr1	no	no	cytoplasmic part	no	no	no	no	no	no	no	no	no	no	no	no	no	no	no	no	no	no	no	no	no	no	no	no	no	no	no	no	no	no	no	no	no	no	no	no	no	no	no	no	no	no	no	no	no
ENSMUSG00000003153	Slc2a3	synapse part	no	cytoplasmic part	no	no	no	plasma membrane part	no	no	no	no	no	no	no	no	cytoplasmic vesicle	vesicle	cytoplasmic membrane-bounded vesicle	membrane-bounded vesicle	no	transporter activity	no	no	no	enzyme binding	no	no	no	no	no	substrate-specific transmembrane transporter activity	substrate-specific transporter activity	transmembrane transporter activity	clathrin-coated vesicle	coated vesicle	no	no	no	no	synaptic vesicle	no	no	kinase binding	no	no	endomembrane system	no	no
ENSMUSG00000003974	Grm3	synapse part	cell projection	no	neuron projection	no	cell projection part	no	dendrite	synaptic membrane	intracellular non-membrane-bounded organelle	non-membrane-bounded organelle	no	cytoskeleton	postsynaptic membrane	no	no	no	no	no	no	no	axon	no	cytoskeletal part	no	no	dendritic spine	no	neuron spine	no	no	no	no	no	no	dendritic spine head	postsynaptic density	no	no	no	no	no	no	no	no	no	no	no
ENSMUSG00000005089	Slc1a2	synapse part	cell projection	no	neuron projection	no	cell projection part	plasma membrane part	dendrite	synaptic membrane	no	no	no	no	no	no	no	no	no	no	no	transporter activity	axon	cell fraction	no	no	no	dendritic spine	insoluble fraction	neuron spine	membrane fraction	substrate-specific transmembrane transporter activity	substrate-specific transporter activity	transmembrane transporter activity	no	no	no	no	intrinsic to plasma membrane	ion transmembrane transporter activity	no	no	no	no	no	no	no	integral to plasma membrane	no
ENSMUSG00000005886	Ncoa2	synapse part	cell projection	cytoplasmic part	neuron projection	no	cell projection part	no	dendrite	no	intracellular non-membrane-bounded organelle	non-membrane-bounded organelle	receptor binding	cytoskeleton	no	cell body	no	no	no	no	neuronal cell body	no	no	no	cytoskeletal part	enzyme binding	protein domain specific binding	dendritic spine	no	neuron spine	no	no	no	no	no	no	dendritic spine head	postsynaptic density	no	no	no	no	no	no	no	no	no	no	no
ENSMUSG00000007021	Syngr3	synapse part	no	cytoplasmic part	no	cell junction	no	no	no	no	no	no	no	no	no	no	cytoplasmic vesicle	vesicle	cytoplasmic membrane-bounded vesicle	membrane-bounded vesicle	no	no	no	no	no	no	protein domain specific binding	no	no	no	no	no	no	no	clathrin-coated vesicle	coated vesicle	no	no	no	no	synaptic vesicle	no	no	no	no	no	no	no	no
ENSMUSG00000007989	Fzd3	synapse part	cell projection	no	neuron projection	no	cell projection part	plasma membrane part	dendrite	no	no	no	no	no	no	cell body	no	no	no	no	neuronal cell body	no	axon	no	no	no	protein domain specific binding	no	no	no	no	no	no	no	no	no	no	no	no	no	no	no	no	no	no	no	no	no	no
ENSMUSG00000010803	Gabra1	synapse part	no	no	no	cell junction	no	plasma membrane part	no	synaptic membrane	no	no	no	no	postsynaptic membrane	no	no	no	no	no	no	transporter activity	no	no	no	no	no	no	no	no	no	substrate-specific transmembrane transporter activity	substrate-specific transporter activity	transmembrane transporter activity	no	no	no	no	intrinsic to plasma membrane	ion transmembrane transporter activity	no	no	no	no	channel activity	no	no	integral to plasma membrane	ion channel activity
ENSMUSG00000013662	Atad1	synapse part	no	cytoplasmic part	no	cell junction	no	no	no	synaptic membrane	no	no	no	no	postsynaptic membrane	no	no	no	no	no	no	no	no	no	no	no	no	no	no	no	no	no	no	no	no	no	no	no	no	no	no	no	no	no	no	no	no	no	no
ENSMUSG00000015002	Efr3a	no	no	no	no	no	no	no	no	no	intracellular non-membrane-bounded organelle	non-membrane-bounded organelle	no	cytoskeleton	no	no	no	no	no	no	no	no	no	no	no	no	no	no	no	no	no	no	no	no	no	no	no	no	no	no	no	protein dimerization activity	identical protein binding	no	no	no	no	no	no
ENSMUSG00000018589	Glra2	synapse part	no	no	no	cell junction	no	plasma membrane part	no	synaptic membrane	no	no	no	no	postsynaptic membrane	no	no	no	no	no	no	transporter activity	no	no	no	no	no	no	no	no	no	substrate-specific transmembrane transporter activity	substrate-specific transporter activity	transmembrane transporter activity	no	no	no	no	intrinsic to plasma membrane	ion transmembrane transporter activity	no	no	no	no	channel activity	no	no	integral to plasma membrane	ion channel activity
ENSMUSG00000019828	Grm1	synapse part	cell projection	no	neuron projection	no	cell projection part	no	dendrite	synaptic membrane	intracellular non-membrane-bounded organelle	non-membrane-bounded organelle	receptor binding	cytoskeleton	postsynaptic membrane	cell body	no	no	no	no	neuronal cell body	no	axon	no	cytoskeletal part	no	no	dendritic spine	no	neuron spine	no	no	no	no	no	no	dendritic spine head	postsynaptic density	no	no	no	no	no	no	no	no	no	no	no
ENSMUSG00000019861	Gopc	synapse part	cell projection	cytoplasmic part	no	cell junction	no	no	no	synaptic membrane	no	no	receptor binding	no	postsynaptic membrane	no	cytoplasmic vesicle	vesicle	cytoplasmic membrane-bounded vesicle	membrane-bounded vesicle	no	no	no	cell fraction	no	no	no	no	insoluble fraction	no	membrane fraction	no	no	no	clathrin-coated vesicle	coated vesicle	no	no	no	no	no	protein dimerization activity	identical protein binding	no	no	no	no	no	no
ENSMUSG00000020122	Egfr	no	no	cytoplasmic part	no	no	no	plasma membrane part	no	no	no	no	receptor binding	no	no	no	cytoplasmic vesicle	vesicle	cytoplasmic membrane-bounded vesicle	membrane-bounded vesicle	no	no	no	no	no	enzyme binding	no	no	no	no	no	no	no	no	no	no	no	no	no	no	no	protein dimerization activity	identical protein binding	kinase binding	no	no	no	no	no
ENSMUSG00000020436	Gabrg2	synapse part	cell projection	no	neuron projection	cell junction	cell projection part	plasma membrane part	no	synaptic membrane	no	no	no	no	postsynaptic membrane	no	no	no	no	no	no	transporter activity	axon	no	no	no	no	no	no	no	no	substrate-specific transmembrane transporter activity	substrate-specific transporter activity	transmembrane transporter activity	no	no	no	no	no	ion transmembrane transporter activity	no	no	no	no	channel activity	no	no	no	ion channel activity
ENSMUSG00000020716	Nf1	synapse part	cell projection	no	neuron projection	no	cell projection part	plasma membrane part	dendrite	no	intracellular non-membrane-bounded organelle	non-membrane-bounded organelle	no	cytoskeleton	no	no	no	no	no	no	no	no	axon	cell fraction	cytoskeletal part	no	no	dendritic spine	insoluble fraction	neuron spine	membrane fraction	no	no	no	no	no	dendritic spine head	postsynaptic density	intrinsic to plasma membrane	no	no	no	no	no	no	no	no	no	no
ENSMUSG00000020902	Ntn1	no	no	no	no	no	no	no	no	no	no	no	no	no	no	no	no	no	no	no	no	no	no	no	no	no	no	no	no	no	no	no	no	no	no	no	no	no	no	no	no	no	no	no	no	no	no	no	no
ENSMUSG00000020961	Ston2	synapse part	no	cytoplasmic part	no	no	no	no	no	no	intracellular non-membrane-bounded organelle	non-membrane-bounded organelle	no	no	no	no	cytoplasmic vesicle	vesicle	cytoplasmic membrane-bounded vesicle	membrane-bounded vesicle	no	no	no	no	no	no	no	no	no	no	no	no	no	no	clathrin-coated vesicle	coated vesicle	no	no	no	no	synaptic vesicle	no	no	no	no	no	no	no	no
ENSMUSG00000021687	Scamp1	synapse part	no	cytoplasmic part	no	no	no	no	no	no	no	no	no	no	no	no	cytoplasmic vesicle	vesicle	cytoplasmic membrane-bounded vesicle	membrane-bounded vesicle	no	no	no	no	no	no	protein domain specific binding	no	no	no	no	no	no	no	clathrin-coated vesicle	coated vesicle	no	no	no	no	synaptic vesicle	no	no	no	no	no	endomembrane system	no	no
ENSMUSG00000021700	Rab3c	synapse part	no	cytoplasmic part	no	no	no	no	no	no	no	no	no	no	no	no	cytoplasmic vesicle	vesicle	cytoplasmic membrane-bounded vesicle	membrane-bounded vesicle	no	no	no	no	no	no	no	no	no	no	no	no	no	no	clathrin-coated vesicle	coated vesicle	no	no	no	no	synaptic vesicle	no	no	no	no	cytosol	no	no	no
ENSMUSG00000021728	Emb	no	no	no	no	no	no	no	no	no	no	no	no	no	no	no	no	no	no	no	no	no	no	no	no	no	no	no	no	no	no	no	no	no	no	no	no	no	no	no	no	no	no	no	no	no	no	no	no
ENSMUSG00000022048	Dpysl2	synapse part	cell projection	cytoplasmic part	neuron projection	no	cell projection part	no	dendrite	no	no	no	no	no	no	cell body	no	no	no	no	neuronal cell body	no	axon	cell fraction	no	enzyme binding	no	no	insoluble fraction	no	membrane fraction	no	no	no	no	no	no	no	no	no	no	no	no	kinase binding	no	cytosol	no	no	no
ENSMUSG00000022197	Pdzd2	synapse part	cell projection	cytoplasmic part	neuron projection	cell junction	cell projection part	no	dendrite	no	intracellular non-membrane-bounded organelle	non-membrane-bounded organelle	no	cytoskeleton	no	no	no	no	no	no	no	no	no	cell fraction	cytoskeletal part	no	no	dendritic spine	insoluble fraction	neuron spine	membrane fraction	no	no	no	no	no	dendritic spine head	postsynaptic density	no	no	no	no	no	no	no	no	no	no	no
ENSMUSG00000022321	Cdh10	no	no	no	no	no	no	no	no	no	no	no	no	no	no	no	no	no	no	no	no	no	no	no	no	no	no	no	no	no	no	no	no	no	no	no	no	no	no	no	no	no	no	no	no	no	no	no	no
ENSMUSG00000022802	Lmln	no	no	no	no	cell junction	no	plasma membrane part	no	no	no	no	no	no	no	no	no	no	no	no	no	no	no	no	no	no	no	no	no	no	no	no	no	no	no	no	no	no	no	no	no	no	no	no	no	no	no	no	no
ENSMUSG00000022812	Gsk3b	no	cell projection	cytoplasmic part	neuron projection	no	cell projection part	no	dendrite	no	intracellular non-membrane-bounded organelle	non-membrane-bounded organelle	receptor binding	cytoskeleton	no	cell body	no	no	no	no	neuronal cell body	no	no	cell fraction	cytoskeletal part	enzyme binding	no	dendritic spine	no	neuron spine	no	no	no	no	no	no	no	no	no	no	no	no	no	kinase binding	no	cytosol	no	no	no
ENSMUSG00000022865	Cxadr	no	cell projection	cytoplasmic part	neuron projection	cell junction	cell projection part	plasma membrane part	no	no	no	no	receptor binding	no	no	cell body	cytoplasmic vesicle	vesicle	cytoplasmic membrane-bounded vesicle	membrane-bounded vesicle	no	no	no	no	no	no	protein domain specific binding	no	no	no	no	no	no	no	no	no	no	no	no	no	no	no	identical protein binding	no	no	no	no	no	no
ENSMUSG00000024083	Pja2	synapse part	no	cytoplasmic part	no	cell junction	no	no	no	synaptic membrane	no	no	no	no	postsynaptic membrane	no	no	no	no	no	no	no	no	no	no	enzyme binding	no	no	no	no	no	no	no	no	no	no	no	no	no	no	no	no	no	kinase binding	no	no	no	no	no
ENSMUSG00000024122	Pdpk1	no	no	cytoplasmic part	no	cell junction	no	no	no	no	no	no	receptor binding	no	no	no	cytoplasmic vesicle	vesicle	cytoplasmic membrane-bounded vesicle	membrane-bounded vesicle	no	no	no	no	no	enzyme binding	no	no	no	no	no	no	no	no	no	no	no	no	no	no	no	no	no	kinase binding	no	cytosol	no	no	no
ENSMUSG00000024211	Grm8	synapse part	cell projection	no	neuron projection	no	no	plasma membrane part	no	synaptic membrane	no	no	no	no	no	cell body	no	no	no	no	neuronal cell body	no	no	no	no	no	no	no	no	no	no	no	no	no	no	no	no	no	intrinsic to plasma membrane	no	no	no	no	no	no	no	no	integral to plasma membrane	no
ENSMUSG00000024241	Sos1	synapse part	cell projection	no	neuron projection	no	cell projection part	no	dendrite	no	intracellular non-membrane-bounded organelle	non-membrane-bounded organelle	no	cytoskeleton	no	cell body	no	no	no	no	neuronal cell body	no	no	no	cytoskeletal part	no	protein domain specific binding	dendritic spine	no	neuron spine	no	no	no	no	no	no	dendritic spine head	postsynaptic density	no	no	no	no	no	no	no	no	no	no	no
ENSMUSG00000024261	Syt4	synapse part	cell projection	cytoplasmic part	neuron projection	cell junction	no	no	no	no	no	no	no	no	no	no	cytoplasmic vesicle	vesicle	cytoplasmic membrane-bounded vesicle	membrane-bounded vesicle	no	transporter activity	no	no	no	no	no	no	no	no	no	no	no	no	clathrin-coated vesicle	coated vesicle	no	no	no	no	synaptic vesicle	no	no	no	no	no	no	no	no
ENSMUSG00000024294	Mib1	synapse part	cell projection	cytoplasmic part	neuron projection	no	cell projection part	no	dendrite	no	intracellular non-membrane-bounded organelle	non-membrane-bounded organelle	no	cytoskeleton	no	no	cytoplasmic vesicle	vesicle	no	no	no	no	no	no	cytoskeletal part	no	no	dendritic spine	no	neuron spine	no	no	no	no	no	no	dendritic spine head	postsynaptic density	no	no	no	no	no	no	no	no	endomembrane system	no	no
ENSMUSG00000024304	Cdh2	synapse part	cell projection	no	no	cell junction	no	plasma membrane part	no	no	no	no	no	no	no	no	no	no	no	no	no	no	no	no	no	enzyme binding	no	no	no	no	no	no	no	no	no	no	no	no	no	no	no	no	no	kinase binding	no	no	no	no	no
ENSMUSG00000024593	Megf10	no	cell projection	no	no	no	no	plasma membrane part	no	no	no	no	no	no	no	no	no	no	no	no	no	no	no	no	no	no	no	no	no	no	no	no	no	no	no	no	no	no	no	no	no	no	no	no	no	no	no	no	no
ENSMUSG00000025272	Tro	no	no	no	no	no	no	no	no	no	no	no	no	no	no	no	no	no	no	no	no	no	no	no	no	no	no	no	no	no	no	no	no	no	no	no	no	no	no	no	no	no	no	no	no	no	no	no	no
ENSMUSG00000025321	Itgb8	no	no	no	no	no	no	no	no	no	no	no	no	no	no	no	no	no	no	no	no	no	no	no	no	no	no	no	no	no	no	no	no	no	no	no	no	no	no	no	no	no	no	no	no	no	no	no	no
ENSMUSG00000025810	Nrp1	no	cell projection	cytoplasmic part	neuron projection	no	cell projection part	no	no	no	intracellular non-membrane-bounded organelle	non-membrane-bounded organelle	no	cytoskeleton	no	cell body	no	no	no	no	neuronal cell body	no	axon	no	cytoskeletal part	no	no	no	no	no	no	no	no	no	no	no	no	no	no	no	no	no	no	no	no	cytosol	no	no	no
ENSMUSG00000025813	Homer2	synapse part	cell projection	no	neuron projection	cell junction	no	no	dendrite	synaptic membrane	no	no	receptor binding	no	postsynaptic membrane	cell body	no	no	no	no	neuronal cell body	no	no	no	no	no	protein domain specific binding	no	no	no	no	no	no	no	no	no	no	no	no	no	no	protein dimerization activity	identical protein binding	no	no	no	no	no	no
ENSMUSG00000025867	Cplx2	no	cell projection	no	neuron projection	no	no	no	dendrite	no	no	no	no	no	no	cell body	no	no	no	no	neuronal cell body	no	no	no	no	no	no	no	no	no	no	no	no	no	no	no	no	no	no	no	no	no	no	no	no	no	no	no	no
ENSMUSG00000025964	Adam23	no	no	no	no	no	no	no	no	no	no	no	no	no	no	no	no	no	no	no	no	no	no	no	no	no	no	no	no	no	no	no	no	no	no	no	no	no	no	no	no	no	no	no	no	no	no	no	no
ENSMUSG00000026249	Serpine2	no	no	cytoplasmic part	no	no	no	plasma membrane part	no	no	no	no	receptor binding	no	no	cell body	cytoplasmic vesicle	vesicle	cytoplasmic membrane-bounded vesicle	membrane-bounded vesicle	neuronal cell body	no	no	cell fraction	no	no	no	no	insoluble fraction	no	membrane fraction	no	no	no	no	no	no	no	no	no	no	no	no	no	no	cytosol	no	no	no
ENSMUSG00000026312	Cdh7	no	no	no	no	no	no	no	no	no	no	no	no	no	no	no	no	no	no	no	no	no	no	no	no	no	no	no	no	no	no	no	no	no	no	no	no	no	no	no	no	no	no	no	no	no	no	no	no
ENSMUSG00000026787	Gad2	synapse part	cell projection	cytoplasmic part	neuron projection	cell junction	no	no	no	no	no	no	no	no	no	no	cytoplasmic vesicle	vesicle	cytoplasmic membrane-bounded vesicle	membrane-bounded vesicle	no	no	axon	cell fraction	no	no	no	no	insoluble fraction	no	no	no	no	no	clathrin-coated vesicle	coated vesicle	no	no	no	no	synaptic vesicle	protein dimerization activity	no	no	no	cytosol	endomembrane system	no	no
ENSMUSG00000026797	Stxbp1	no	no	cytoplasmic part	no	no	no	no	no	no	no	no	no	no	no	no	cytoplasmic vesicle	vesicle	cytoplasmic membrane-bounded vesicle	membrane-bounded vesicle	no	no	no	no	no	enzyme binding	protein domain specific binding	no	no	no	no	no	no	no	no	no	no	no	no	no	no	no	identical protein binding	kinase binding	no	no	no	no	no
ENSMUSG00000027799	Nbea	synapse part	no	cytoplasmic part	no	cell junction	no	no	no	synaptic membrane	no	no	no	no	postsynaptic membrane	no	no	no	no	no	no	no	no	no	no	enzyme binding	no	no	no	no	no	no	no	no	no	no	no	no	no	no	no	no	no	kinase binding	no	cytosol	endomembrane system	no	no
ENSMUSG00000028020	Glrb	synapse part	no	cytoplasmic part	no	cell junction	no	plasma membrane part	no	synaptic membrane	no	no	no	no	postsynaptic membrane	no	no	no	no	no	no	transporter activity	no	no	no	no	no	no	no	no	no	substrate-specific transmembrane transporter activity	substrate-specific transporter activity	transmembrane transporter activity	no	no	no	no	no	ion transmembrane transporter activity	no	no	no	no	channel activity	no	no	no	ion channel activity
ENSMUSG00000028456	Unc13b	no	no	cytoplasmic part	no	cell junction	no	no	no	no	no	no	no	no	no	no	no	no	no	no	no	no	no	no	no	no	no	no	no	no	no	no	no	no	no	no	no	no	no	no	no	no	no	no	no	no	no	no	no
ENSMUSG00000028517	Ppap2b	no	no	cytoplasmic part	no	no	no	no	no	no	no	no	receptor binding	no	no	no	no	no	no	no	no	no	no	no	no	no	no	no	no	no	no	no	no	no	no	no	no	no	no	no	no	no	no	no	no	no	endomembrane system	no	no
ENSMUSG00000028833	Ncdn	no	cell projection	cytoplasmic part	neuron projection	no	no	no	dendrite	no	no	no	no	no	no	cell body	no	no	no	no	neuronal cell body	no	axon	no	no	no	no	no	no	no	no	no	no	no	no	no	no	no	no	no	no	no	no	no	no	cytosol	no	no	no
ENSMUSG00000029084	Cd38	no	no	no	no	no	no	no	no	no	no	no	no	no	no	no	no	no	no	no	no	no	no	cell fraction	no	no	no	no	insoluble fraction	no	membrane fraction	no	no	no	no	no	no	no	no	no	no	no	no	no	no	no	no	no	no
ENSMUSG00000029131	Dnajb6	no	no	cytoplasmic part	no	no	no	no	no	no	no	no	no	no	no	no	no	no	no	no	no	no	no	no	no	no	no	no	no	no	no	no	no	no	no	no	no	no	no	no	no	no	no	no	no	no	no	no	no
ENSMUSG00000029212	Gabrb1	synapse part	cell projection	no	neuron projection	cell junction	no	no	dendrite	synaptic membrane	no	no	no	no	postsynaptic membrane	no	no	no	no	no	no	transporter activity	no	cell fraction	no	no	no	no	insoluble fraction	no	membrane fraction	substrate-specific transmembrane transporter activity	substrate-specific transporter activity	transmembrane transporter activity	no	no	no	no	no	ion transmembrane transporter activity	no	no	no	no	channel activity	no	endomembrane system	no	ion channel activity
ENSMUSG00000029231	Pdgfra	no	no	no	no	no	no	plasma membrane part	no	no	no	no	receptor binding	no	no	no	no	no	no	no	no	no	no	no	no	enzyme binding	no	no	no	no	no	no	no	no	no	no	no	no	intrinsic to plasma membrane	no	no	protein dimerization activity	identical protein binding	kinase binding	no	no	no	integral to plasma membrane	no
ENSMUSG00000029761	Cald1	synapse part	cell projection	cytoplasmic part	neuron projection	no	cell projection part	no	dendrite	no	intracellular non-membrane-bounded organelle	non-membrane-bounded organelle	no	cytoskeleton	no	cell body	no	no	no	no	neuronal cell body	no	no	no	cytoskeletal part	no	no	dendritic spine	no	neuron spine	no	no	no	no	no	no	dendritic spine head	postsynaptic density	no	no	no	no	no	no	no	no	no	no	no
ENSMUSG00000030092	Cntn6	no	no	no	no	no	no	no	no	no	no	no	no	no	no	no	no	no	no	no	no	no	no	no	no	no	no	no	no	no	no	no	no	no	no	no	no	no	no	no	no	no	no	no	no	no	no	no	no
ENSMUSG00000030209	Grin2b	synapse part	cell projection	cytoplasmic part	neuron projection	cell junction	cell projection part	plasma membrane part	dendrite	synaptic membrane	intracellular non-membrane-bounded organelle	non-membrane-bounded organelle	receptor binding	cytoskeleton	postsynaptic membrane	no	cytoplasmic vesicle	vesicle	cytoplasmic membrane-bounded vesicle	membrane-bounded vesicle	no	transporter activity	axon	cell fraction	cytoskeletal part	no	no	dendritic spine	insoluble fraction	neuron spine	membrane fraction	substrate-specific transmembrane transporter activity	substrate-specific transporter activity	transmembrane transporter activity	clathrin-coated vesicle	coated vesicle	dendritic spine head	postsynaptic density	intrinsic to plasma membrane	ion transmembrane transporter activity	synaptic vesicle	protein dimerization activity	no	no	channel activity	no	no	integral to plasma membrane	ion channel activity
ENSMUSG00000030302	Atp2b2	no	cell projection	cytoplasmic part	neuron projection	no	no	plasma membrane part	dendrite	no	no	no	receptor binding	no	no	cell body	no	no	no	no	neuronal cell body	transporter activity	no	no	no	no	protein domain specific binding	no	no	no	no	substrate-specific transmembrane transporter activity	substrate-specific transporter activity	transmembrane transporter activity	no	no	no	no	no	ion transmembrane transporter activity	no	no	no	no	no	no	no	no	no
ENSMUSG00000030465	Psd3	synapse part	no	no	no	cell junction	no	no	no	synaptic membrane	no	no	no	no	postsynaptic membrane	no	no	no	no	no	no	no	no	no	no	no	no	no	no	no	no	no	no	no	no	no	no	no	no	no	no	no	no	no	no	no	no	no	no
ENSMUSG00000030500	Slc17a6	synapse part	no	cytoplasmic part	no	cell junction	no	no	no	no	no	no	no	no	no	no	cytoplasmic vesicle	vesicle	cytoplasmic membrane-bounded vesicle	membrane-bounded vesicle	no	transporter activity	no	cell fraction	no	no	no	no	insoluble fraction	no	membrane fraction	substrate-specific transmembrane transporter activity	substrate-specific transporter activity	transmembrane transporter activity	clathrin-coated vesicle	coated vesicle	no	no	no	no	synaptic vesicle	no	no	no	no	no	no	no	no
ENSMUSG00000031144	Syp	synapse part	cell projection	cytoplasmic part	neuron projection	cell junction	cell projection part	no	no	synaptic membrane	no	no	no	no	no	no	cytoplasmic vesicle	vesicle	cytoplasmic membrane-bounded vesicle	membrane-bounded vesicle	no	transporter activity	no	cell fraction	no	no	protein domain specific binding	no	insoluble fraction	no	membrane fraction	no	no	no	clathrin-coated vesicle	coated vesicle	no	no	no	no	synaptic vesicle	no	identical protein binding	no	no	no	endomembrane system	no	no
ENSMUSG00000031227	Magee1	synapse part	cell projection	cytoplasmic part	neuron projection	no	no	plasma membrane part	dendrite	synaptic membrane	no	no	no	no	postsynaptic membrane	no	no	no	no	no	no	no	no	no	no	no	no	no	no	no	no	no	no	no	no	no	no	no	no	no	no	no	no	no	no	no	no	no	no
ENSMUSG00000031355	Arhgap6	no	no	no	no	no	no	no	no	no	intracellular non-membrane-bounded organelle	non-membrane-bounded organelle	no	cytoskeleton	no	no	no	no	no	no	no	no	no	no	no	enzyme binding	protein domain specific binding	no	no	no	no	no	no	no	no	no	no	no	no	no	no	no	no	no	no	no	no	no	no
ENSMUSG00000031393	Mecp2	no	no	cytoplasmic part	no	no	no	no	no	no	intracellular non-membrane-bounded organelle	non-membrane-bounded organelle	no	no	no	no	no	no	no	no	no	no	no	no	no	enzyme binding	protein domain specific binding	no	no	no	no	no	no	no	no	no	no	no	no	no	no	no	no	no	no	cytosol	no	no	no
ENSMUSG00000031548	Sfrp1	no	no	cytoplasmic part	no	no	no	no	no	no	no	no	receptor binding	no	no	no	no	no	no	no	no	no	no	no	no	no	protein domain specific binding	no	no	no	no	no	no	no	no	no	no	no	no	no	no	no	identical protein binding	no	no	cytosol	no	no	no
ENSMUSG00000031555	Adam9	no	no	no	no	no	no	plasma membrane part	no	no	no	no	receptor binding	no	no	no	no	no	no	no	no	no	no	no	no	enzyme binding	protein domain specific binding	no	no	no	no	no	no	no	no	no	no	no	intrinsic to plasma membrane	no	no	no	no	kinase binding	no	no	no	no	no
ENSMUSG00000031772	Cntnap4	no	cell projection	no	neuron projection	no	no	no	dendrite	no	no	no	receptor binding	no	no	no	no	no	no	no	no	no	no	no	no	no	no	no	no	no	no	no	no	no	no	no	no	no	no	no	no	no	no	no	no	no	no	no	no
ENSMUSG00000032011	Thy1	no	cell projection	cytoplasmic part	neuron projection	no	cell projection part	plasma membrane part	dendrite	no	no	no	receptor binding	no	no	no	no	no	no	no	no	no	no	no	no	enzyme binding	no	no	no	no	no	no	no	no	no	no	no	no	intrinsic to plasma membrane	no	no	no	no	kinase binding	no	cytosol	no	no	no
ENSMUSG00000032076	Cadm1	synapse part	cell projection	cytoplasmic part	neuron projection	cell junction	no	plasma membrane part	dendrite	no	no	no	receptor binding	no	no	no	cytoplasmic vesicle	vesicle	cytoplasmic membrane-bounded vesicle	membrane-bounded vesicle	no	no	axon	cell fraction	no	no	protein domain specific binding	no	insoluble fraction	no	membrane fraction	no	no	no	clathrin-coated vesicle	coated vesicle	no	no	no	no	synaptic vesicle	protein dimerization activity	identical protein binding	no	no	no	no	no	no
ENSMUSG00000032087	Dscaml1	no	no	no	no	no	no	no	no	no	no	no	no	no	no	no	no	no	no	no	no	no	no	no	no	no	no	no	no	no	no	no	no	no	no	no	no	no	no	no	no	protein dimerization activity	identical protein binding	no	no	no	no	no	no
ENSMUSG00000032332	Col12a1	no	no	no	no	no	no	no	no	no	no	no	no	no	no	no	no	no	no	no	no	no	no	no	no	no	no	no	no	no	no	no	no	no	no	no	no	no	no	no	no	no	no	no	no	no	no	no	no
ENSMUSG00000032336	Nptn	synapse part	no	no	no	no	no	no	no	synaptic membrane	no	no	receptor binding	no	no	no	no	no	no	no	no	no	no	no	no	no	no	no	no	no	no	no	no	no	no	no	no	no	no	no	no	no	no	no	no	no	no	no	no
ENSMUSG00000032338	Hcn4	synapse part	cell projection	no	neuron projection	no	cell projection part	no	no	no	no	no	no	no	no	no	no	no	no	no	no	transporter activity	axon	no	no	no	no	no	no	no	no	substrate-specific transmembrane transporter activity	substrate-specific transporter activity	transmembrane transporter activity	no	no	no	no	no	ion transmembrane transporter activity	no	no	no	no	channel activity	no	no	no	ion channel activity
ENSMUSG00000032356	Rasgrf1	no	cell projection	cytoplasmic part	neuron projection	no	cell projection part	no	no	no	no	no	receptor binding	no	no	no	no	no	no	no	no	no	no	no	no	no	no	no	no	no	no	no	no	no	no	no	no	no	no	no	no	no	no	no	no	cytosol	no	no	no
ENSMUSG00000033060	Lmo7	no	no	no	no	cell junction	no	plasma membrane part	no	no	no	no	no	no	no	no	no	no	no	no	no	no	no	no	no	no	no	no	no	no	no	no	no	no	no	no	no	no	no	no	no	no	no	no	no	no	no	no	no
ENSMUSG00000033295	Ptprf	no	cell projection	cytoplasmic part	neuron projection	no	cell projection part	no	no	no	no	no	receptor binding	no	no	cell body	no	no	no	no	neuronal cell body	no	no	cell fraction	no	no	no	no	insoluble fraction	no	membrane fraction	no	no	no	no	no	no	no	no	no	no	no	no	no	no	no	no	no	no
ENSMUSG00000033419	Snap91	synapse part	cell projection	cytoplasmic part	neuron projection	no	cell projection part	plasma membrane part	dendrite	synaptic membrane	intracellular non-membrane-bounded organelle	non-membrane-bounded organelle	no	cytoskeleton	postsynaptic membrane	no	cytoplasmic vesicle	vesicle	cytoplasmic membrane-bounded vesicle	membrane-bounded vesicle	no	no	no	no	cytoskeletal part	no	no	dendritic spine	no	neuron spine	no	no	no	no	clathrin-coated vesicle	coated vesicle	dendritic spine head	postsynaptic density	no	no	synaptic vesicle	no	no	no	no	no	endomembrane system	no	no
ENSMUSG00000034187	Nsf	synapse part	cell projection	cytoplasmic part	neuron projection	no	cell projection part	no	dendrite	no	intracellular non-membrane-bounded organelle	non-membrane-bounded organelle	no	cytoskeleton	no	no	no	no	no	no	no	no	no	no	cytoskeletal part	enzyme binding	protein domain specific binding	dendritic spine	no	neuron spine	no	no	no	no	no	no	dendritic spine head	postsynaptic density	no	no	no	no	no	no	no	no	no	no	no
ENSMUSG00000034593	Myo5a	synapse part	cell projection	cytoplasmic part	neuron projection	no	no	no	no	no	intracellular non-membrane-bounded organelle	non-membrane-bounded organelle	no	cytoskeleton	no	cell body	cytoplasmic vesicle	vesicle	cytoplasmic membrane-bounded vesicle	membrane-bounded vesicle	neuronal cell body	no	axon	no	cytoskeletal part	no	no	no	no	no	no	no	no	no	clathrin-coated vesicle	coated vesicle	no	no	no	no	synaptic vesicle	protein dimerization activity	no	no	no	no	no	no	no
ENSMUSG00000034755	Pcdh11x	no	no	no	no	no	no	no	no	no	no	no	no	no	no	no	no	no	no	no	no	no	no	no	no	no	no	no	no	no	no	no	no	no	no	no	no	no	no	no	no	no	no	no	no	no	no	no	no
ENSMUSG00000035168	Tanc1	synapse part	cell projection	no	neuron projection	cell junction	cell projection part	no	dendrite	synaptic membrane	no	no	no	no	postsynaptic membrane	cell body	no	no	no	no	neuronal cell body	no	axon	no	no	no	no	no	no	no	no	no	no	no	no	no	no	no	no	no	no	no	no	no	no	no	no	no	no
ENSMUSG00000035864	Syt1	synapse part	cell projection	cytoplasmic part	neuron projection	cell junction	no	no	no	synaptic membrane	no	no	receptor binding	no	no	no	cytoplasmic vesicle	vesicle	cytoplasmic membrane-bounded vesicle	membrane-bounded vesicle	no	transporter activity	no	no	no	no	no	no	no	no	no	no	no	no	clathrin-coated vesicle	coated vesicle	no	no	no	no	synaptic vesicle	no	identical protein binding	no	no	no	endomembrane system	no	no
ENSMUSG00000036306	Lzts1	synapse part	cell projection	cytoplasmic part	neuron projection	cell junction	cell projection part	plasma membrane part	dendrite	synaptic membrane	intracellular non-membrane-bounded organelle	non-membrane-bounded organelle	no	cytoskeleton	postsynaptic membrane	cell body	no	no	no	no	no	no	no	cell fraction	cytoskeletal part	no	no	dendritic spine	insoluble fraction	neuron spine	membrane fraction	no	no	no	no	no	dendritic spine head	postsynaptic density	no	no	no	no	no	no	no	no	no	no	no
ENSMUSG00000037428	Vgf	no	cell projection	cytoplasmic part	neuron projection	no	no	no	no	no	no	no	receptor binding	no	no	cell body	cytoplasmic vesicle	vesicle	cytoplasmic membrane-bounded vesicle	membrane-bounded vesicle	neuronal cell body	no	no	no	no	no	no	no	no	no	no	no	no	no	no	no	no	no	no	no	no	no	no	no	no	no	endomembrane system	no	no
ENSMUSG00000037892	Pcdh18	no	no	no	no	no	no	plasma membrane part	no	no	no	no	no	no	no	no	no	no	no	no	no	no	no	no	no	no	no	no	no	no	no	no	no	no	no	no	no	no	intrinsic to plasma membrane	no	no	no	no	no	no	no	no	integral to plasma membrane	no
ENSMUSG00000037996	Slc24a2	no	no	no	no	no	no	no	no	no	no	no	no	no	no	no	no	no	no	no	no	transporter activity	no	no	no	no	no	no	no	no	no	substrate-specific transmembrane transporter activity	substrate-specific transporter activity	transmembrane transporter activity	no	no	no	no	no	ion transmembrane transporter activity	no	protein dimerization activity	no	no	channel activity	no	no	no	ion channel activity
ENSMUSG00000038257	Glra3	synapse part	no	no	no	cell junction	no	plasma membrane part	no	synaptic membrane	no	no	no	no	postsynaptic membrane	no	no	no	no	no	no	transporter activity	no	no	no	no	no	no	no	no	no	substrate-specific transmembrane transporter activity	substrate-specific transporter activity	transmembrane transporter activity	no	no	no	no	intrinsic to plasma membrane	ion transmembrane transporter activity	no	no	no	no	channel activity	no	no	integral to plasma membrane	ion channel activity
ENSMUSG00000038418	Egr1	no	no	no	no	no	no	no	no	no	no	no	no	no	no	no	no	no	no	no	no	no	no	no	no	enzyme binding	no	no	no	no	no	no	no	no	no	no	no	no	no	no	no	no	no	no	no	no	no	no	no
ENSMUSG00000039385	Cdh6	no	no	no	no	no	no	no	no	no	no	no	no	no	no	no	no	no	no	no	no	no	no	no	no	no	no	no	no	no	no	no	no	no	no	no	no	no	no	no	no	no	no	no	no	no	no	no	no
ENSMUSG00000039542	Ncam1	no	cell projection	no	neuron projection	no	cell projection part	plasma membrane part	no	no	no	no	no	no	no	cell body	no	no	no	no	neuronal cell body	no	axon	no	no	enzyme binding	protein domain specific binding	no	no	no	no	no	no	no	no	no	no	no	no	no	no	no	no	no	no	no	no	no	no
ENSMUSG00000040265	Dnm3	synapse part	cell projection	cytoplasmic part	neuron projection	no	cell projection part	no	dendrite	no	intracellular non-membrane-bounded organelle	non-membrane-bounded organelle	no	cytoskeleton	no	no	no	no	no	no	no	no	no	no	cytoskeletal part	no	no	dendritic spine	no	neuron spine	no	no	no	no	no	no	dendritic spine head	postsynaptic density	no	no	no	no	no	no	no	no	no	no	no
ENSMUSG00000040640	Erc2	synapse part	cell projection	no	neuron projection	cell junction	cell projection part	no	dendrite	synaptic membrane	intracellular non-membrane-bounded organelle	non-membrane-bounded organelle	no	cytoskeleton	no	cell body	no	no	no	no	neuronal cell body	no	axon	cell fraction	cytoskeletal part	no	protein domain specific binding	dendritic spine	insoluble fraction	neuron spine	membrane fraction	no	no	no	no	no	dendritic spine head	postsynaptic density	no	no	no	no	no	no	no	no	no	no	no
ENSMUSG00000040722	Scamp5	synapse part	no	cytoplasmic part	no	cell junction	no	no	no	no	no	no	no	no	no	no	cytoplasmic vesicle	vesicle	cytoplasmic membrane-bounded vesicle	membrane-bounded vesicle	no	no	no	no	no	no	no	no	no	no	no	no	no	no	clathrin-coated vesicle	coated vesicle	no	no	no	no	synaptic vesicle	no	no	no	no	no	endomembrane system	no	no
ENSMUSG00000040998	Npnt	no	no	cytoplasmic part	no	no	no	plasma membrane part	no	no	intracellular non-membrane-bounded organelle	non-membrane-bounded organelle	receptor binding	no	no	no	no	no	no	no	no	no	no	no	no	no	no	no	no	no	no	no	no	no	no	no	no	no	intrinsic to plasma membrane	no	no	no	no	no	no	no	no	integral to plasma membrane	no
ENSMUSG00000041075	Fzd7	no	cell projection	no	neuron projection	no	cell projection part	plasma membrane part	no	no	no	no	no	no	no	no	no	no	no	no	no	no	no	no	no	no	protein domain specific binding	no	no	no	no	no	no	no	no	no	no	no	no	no	no	no	no	no	no	no	no	no	no
ENSMUSG00000041078	Grid1	synapse part	no	no	no	cell junction	no	no	no	synaptic membrane	no	no	no	no	postsynaptic membrane	no	no	no	no	no	no	transporter activity	no	no	no	no	no	no	no	no	no	substrate-specific transmembrane transporter activity	substrate-specific transporter activity	transmembrane transporter activity	no	no	no	no	no	ion transmembrane transporter activity	no	no	no	no	channel activity	no	no	no	ion channel activity
ENSMUSG00000041444	Arhgap32	synapse part	cell projection	cytoplasmic part	no	cell junction	no	no	no	synaptic membrane	intracellular non-membrane-bounded organelle	non-membrane-bounded organelle	no	cytoskeleton	postsynaptic membrane	no	no	no	no	no	no	no	no	no	no	no	no	no	no	no	no	no	no	no	no	no	no	no	no	no	no	no	no	no	no	no	no	no	no
ENSMUSG00000041670	Rims1	synapse part	no	no	no	cell junction	no	no	no	synaptic membrane	no	no	no	no	no	no	no	no	no	no	no	no	no	no	no	enzyme binding	protein domain specific binding	no	no	no	no	no	no	no	no	no	no	no	no	no	no	no	no	kinase binding	no	no	no	no	no
ENSMUSG00000043313	Pcdhb19	no	no	no	no	no	no	no	no	no	no	no	no	no	no	no	no	no	no	no	no	no	no	no	no	no	no	no	no	no	no	no	no	no	no	no	no	no	no	no	no	no	no	no	no	no	no	no	no
ENSMUSG00000044043	Pcdhb14	no	no	no	no	no	no	no	no	no	no	no	no	no	no	no	no	no	no	no	no	no	no	no	no	no	no	no	no	no	no	no	no	no	no	no	no	no	no	no	no	no	no	no	no	no	no	no	no
ENSMUSG00000045038	Prkce	no	no	cytoplasmic part	no	no	no	no	no	no	intracellular non-membrane-bounded organelle	non-membrane-bounded organelle	no	cytoskeleton	no	no	no	no	no	no	no	no	no	cell fraction	no	enzyme binding	protein domain specific binding	no	insoluble fraction	no	membrane fraction	no	no	no	no	no	no	no	no	no	no	no	no	kinase binding	no	cytosol	endomembrane system	no	no
ENSMUSG00000045062	Pcdhb7	no	no	no	no	no	no	no	no	no	no	no	no	no	no	no	no	no	no	no	no	no	no	no	no	no	no	no	no	no	no	no	no	no	no	no	no	no	no	no	no	no	no	no	no	no	no	no	no
ENSMUSG00000045498	Pcdhb3	no	no	no	no	no	no	no	no	no	no	no	no	no	no	no	no	no	no	no	no	no	no	no	no	no	no	no	no	no	no	no	no	no	no	no	no	no	no	no	no	no	no	no	no	no	no	no	no
ENSMUSG00000045689	Pcdhb4	no	no	no	no	no	no	no	no	no	intracellular non-membrane-bounded organelle	non-membrane-bounded organelle	no	cytoskeleton	no	no	no	no	no	no	no	no	no	no	no	no	no	no	no	no	no	no	no	no	no	no	no	no	no	no	no	no	no	no	no	no	no	no	no
ENSMUSG00000046159	Chrm3	synapse part	cell projection	no	neuron projection	cell junction	cell projection part	plasma membrane part	dendrite	synaptic membrane	no	no	no	no	postsynaptic membrane	no	no	no	no	no	no	no	axon	no	no	no	no	no	no	no	no	no	no	no	no	no	no	no	intrinsic to plasma membrane	no	no	no	no	no	no	no	no	integral to plasma membrane	no
ENSMUSG00000046447	Camk2n1	synapse part	cell projection	no	neuron projection	cell junction	cell projection part	no	dendrite	synaptic membrane	intracellular non-membrane-bounded organelle	non-membrane-bounded organelle	no	cytoskeleton	postsynaptic membrane	cell body	no	no	no	no	neuronal cell body	no	no	cell fraction	cytoskeletal part	enzyme binding	no	dendritic spine	insoluble fraction	neuron spine	membrane fraction	no	no	no	no	no	dendritic spine head	postsynaptic density	no	no	no	no	no	kinase binding	no	no	no	no	no
ENSMUSG00000048218	Amigo2	no	no	no	no	no	no	no	no	no	no	no	no	no	no	no	no	no	no	no	no	no	no	no	no	no	no	no	no	no	no	no	no	no	no	no	no	no	no	no	no	no	no	no	no	no	no	no	no
ENSMUSG00000048347	Pcdhb18	no	no	no	no	no	no	no	no	no	no	no	no	no	no	no	no	no	no	no	no	no	no	no	no	no	no	no	no	no	no	no	no	no	no	no	no	no	no	no	no	no	no	no	no	no	no	no	no
ENSMUSG00000049583	Grm5	synapse part	cell projection	no	neuron projection	no	cell projection part	no	dendrite	no	intracellular non-membrane-bounded organelle	non-membrane-bounded organelle	receptor binding	cytoskeleton	no	no	no	no	no	no	no	no	no	cell fraction	cytoskeletal part	no	no	dendritic spine	insoluble fraction	neuron spine	membrane fraction	no	no	no	no	no	dendritic spine head	postsynaptic density	no	no	no	no	no	no	no	no	no	no	no
ENSMUSG00000049612	Omg	no	no	no	no	no	no	no	no	no	no	no	no	no	no	no	no	no	no	no	no	no	no	no	no	no	no	no	no	no	no	no	no	no	no	no	no	no	no	no	no	protein dimerization activity	identical protein binding	no	no	no	no	no	no
ENSMUSG00000050272	Dscam	no	cell projection	no	neuron projection	no	cell projection part	no	no	no	no	no	no	no	no	no	no	no	no	no	no	no	axon	no	no	no	no	no	no	no	no	no	no	no	no	no	no	no	no	no	no	no	no	no	no	no	no	no	no
ENSMUSG00000050556	Kcnb1	synapse part	cell projection	no	neuron projection	no	cell projection part	plasma membrane part	dendrite	synaptic membrane	no	no	no	no	postsynaptic membrane	cell body	no	no	no	no	neuronal cell body	transporter activity	no	no	no	no	no	no	no	no	no	substrate-specific transmembrane transporter activity	substrate-specific transporter activity	transmembrane transporter activity	no	no	no	no	intrinsic to plasma membrane	ion transmembrane transporter activity	no	no	no	no	channel activity	no	no	integral to plasma membrane	ion channel activity
ENSMUSG00000050761	Gp1bb	no	no	no	no	no	no	plasma membrane part	no	no	no	no	no	no	no	no	no	no	no	no	no	no	no	no	no	no	no	no	no	no	no	no	no	no	no	no	no	no	intrinsic to plasma membrane	no	no	no	no	no	no	no	no	integral to plasma membrane	no
ENSMUSG00000051177	Plcb1	no	no	cytoplasmic part	no	no	no	no	no	no	intracellular non-membrane-bounded organelle	non-membrane-bounded organelle	no	no	no	no	no	no	no	no	no	no	no	cell fraction	no	enzyme binding	no	no	insoluble fraction	no	membrane fraction	no	no	no	no	no	no	no	no	no	no	protein dimerization activity	identical protein binding	no	no	cytosol	no	no	no
ENSMUSG00000051391	Ywhag	no	no	no	no	no	no	no	no	no	no	no	receptor binding	no	no	no	no	no	no	no	no	no	no	no	no	enzyme binding	protein domain specific binding	no	no	no	no	no	no	no	no	no	no	no	no	no	no	no	no	kinase binding	no	no	no	no	no
ENSMUSG00000051599	Pcdhb2	no	no	no	no	no	no	no	no	no	no	no	no	no	no	no	no	no	no	no	no	no	no	no	no	no	no	no	no	no	no	no	no	no	no	no	no	no	no	no	no	no	no	no	no	no	no	no	no
ENSMUSG00000051678	Pcdhb6	no	no	no	no	no	no	no	no	no	no	no	no	no	no	no	no	no	no	no	no	no	no	no	no	no	no	no	no	no	no	no	no	no	no	no	no	no	no	no	no	no	no	no	no	no	no	no	no
ENSMUSG00000052613	Pcdh15	no	cell projection	no	no	no	no	no	no	no	intracellular non-membrane-bounded organelle	non-membrane-bounded organelle	no	no	no	no	no	no	no	no	no	no	no	no	no	no	no	no	no	no	no	no	no	no	no	no	no	no	no	no	no	no	no	no	no	no	no	no	no
ENSMUSG00000052727	Mtap1b	synapse part	cell projection	cytoplasmic part	neuron projection	no	cell projection part	no	dendrite	no	intracellular non-membrane-bounded organelle	non-membrane-bounded organelle	no	cytoskeleton	no	cell body	no	no	no	no	neuronal cell body	no	axon	cell fraction	cytoskeletal part	no	no	dendritic spine	no	neuron spine	no	no	no	no	no	no	dendritic spine head	postsynaptic density	no	no	no	no	no	no	no	cytosol	no	no	no
ENSMUSG00000055022	Cntn1	no	no	no	no	no	no	no	no	no	no	no	no	no	no	no	no	no	no	no	no	no	no	no	no	no	no	no	no	no	no	no	no	no	no	no	no	no	no	no	no	no	no	no	no	no	no	no	no
ENSMUSG00000055026	Gabrg3	synapse part	no	no	no	cell junction	no	no	no	synaptic membrane	no	no	no	no	postsynaptic membrane	no	no	no	no	no	no	transporter activity	no	no	no	no	no	no	no	no	no	substrate-specific transmembrane transporter activity	substrate-specific transporter activity	transmembrane transporter activity	no	no	no	no	no	ion transmembrane transporter activity	no	no	no	no	channel activity	no	no	no	ion channel activity
ENSMUSG00000058589	Anks1b	synapse part	cell projection	no	no	cell junction	no	no	no	synaptic membrane	no	no	receptor binding	no	postsynaptic membrane	no	no	no	no	no	no	no	no	no	no	no	no	no	no	no	no	no	no	no	no	no	no	no	no	no	no	no	no	no	no	no	no	no	no
ENSMUSG00000059602	Syn3	synapse part	no	cytoplasmic part	no	cell junction	no	no	no	no	no	no	no	no	no	no	cytoplasmic vesicle	vesicle	cytoplasmic membrane-bounded vesicle	membrane-bounded vesicle	no	no	no	no	no	no	no	no	no	no	no	no	no	no	clathrin-coated vesicle	coated vesicle	no	no	no	no	synaptic vesicle	no	no	no	no	no	endomembrane system	no	no
ENSMUSG00000059674	Cdh24	no	no	no	no	cell junction	no	no	no	no	no	no	no	no	no	no	no	no	no	no	no	no	no	no	no	no	no	no	no	no	no	no	no	no	no	no	no	no	no	no	no	no	no	no	no	no	no	no	no
ENSMUSG00000059974	Ntm	no	cell projection	cytoplasmic part	neuron projection	no	no	no	no	no	no	no	no	no	no	no	no	no	no	no	no	no	axon	no	no	no	no	no	no	no	no	no	no	no	no	no	no	no	no	no	no	no	no	no	no	no	no	no	no
ENSMUSG00000060882	Kcnd2	synapse part	cell projection	no	neuron projection	no	cell projection part	plasma membrane part	dendrite	no	intracellular non-membrane-bounded organelle	non-membrane-bounded organelle	no	cytoskeleton	no	cell body	no	no	no	no	neuronal cell body	transporter activity	no	cell fraction	cytoskeletal part	no	no	dendritic spine	insoluble fraction	neuron spine	membrane fraction	substrate-specific transmembrane transporter activity	substrate-specific transporter activity	transmembrane transporter activity	no	no	dendritic spine head	postsynaptic density	intrinsic to plasma membrane	ion transmembrane transporter activity	no	protein dimerization activity	no	no	channel activity	no	no	integral to plasma membrane	ion channel activity
ENSMUSG00000061665	Cd2ap	no	cell projection	cytoplasmic part	no	no	no	no	no	no	intracellular non-membrane-bounded organelle	non-membrane-bounded organelle	receptor binding	cytoskeleton	no	no	cytoplasmic vesicle	vesicle	cytoplasmic membrane-bounded vesicle	membrane-bounded vesicle	no	no	no	no	cytoskeletal part	no	protein domain specific binding	no	no	no	no	no	no	no	no	no	no	no	no	no	no	no	no	no	no	no	no	no	no
ENSMUSG00000062209	Erbb4	synapse part	cell projection	cytoplasmic part	neuron projection	no	cell projection part	plasma membrane part	dendrite	no	intracellular non-membrane-bounded organelle	non-membrane-bounded organelle	receptor binding	cytoskeleton	no	no	no	no	no	no	no	no	no	no	cytoskeletal part	no	no	dendritic spine	no	neuron spine	no	no	no	no	no	no	dendritic spine head	postsynaptic density	no	no	no	protein dimerization activity	identical protein binding	no	no	no	no	no	no
ENSMUSG00000063142	Kcnma1	synapse part	cell projection	cytoplasmic part	neuron projection	no	cell projection part	plasma membrane part	dendrite	synaptic membrane	no	no	no	no	postsynaptic membrane	cell body	no	no	no	no	neuronal cell body	transporter activity	axon	no	no	no	no	no	no	no	no	substrate-specific transmembrane transporter activity	substrate-specific transporter activity	transmembrane transporter activity	no	no	no	no	intrinsic to plasma membrane	ion transmembrane transporter activity	no	protein dimerization activity	identical protein binding	no	channel activity	no	no	integral to plasma membrane	ion channel activity
ENSMUSG00000063260	Syt10	synapse part	no	cytoplasmic part	no	cell junction	no	no	no	no	no	no	no	no	no	no	cytoplasmic vesicle	vesicle	cytoplasmic membrane-bounded vesicle	membrane-bounded vesicle	no	transporter activity	no	no	no	no	no	no	no	no	no	no	no	no	clathrin-coated vesicle	coated vesicle	no	no	no	no	synaptic vesicle	protein dimerization activity	identical protein binding	no	no	no	no	no	no
ENSMUSG00000063687	Pcdhb5	no	no	no	no	no	no	no	no	no	no	no	no	no	no	no	no	no	no	no	no	no	no	no	no	no	no	no	no	no	no	no	no	no	no	no	no	no	no	no	no	no	no	no	no	no	no	no	no
ENSMUSG00000063887	Nlgn1	synapse part	cell projection	no	neuron projection	cell junction	cell projection part	plasma membrane part	dendrite	synaptic membrane	no	no	no	no	postsynaptic membrane	no	no	no	no	no	no	no	no	no	no	no	no	no	no	no	no	no	no	no	no	no	no	no	intrinsic to plasma membrane	no	no	protein dimerization activity	no	no	no	no	no	integral to plasma membrane	no
ENSMUSG00000064293	Cntn4	no	no	no	no	no	no	no	no	no	no	no	no	no	no	no	no	no	no	no	no	no	no	no	no	no	no	no	no	no	no	no	no	no	no	no	no	no	no	no	no	no	no	no	no	no	no	no	no
ENSMUSG00000066392	Nrxn3	synapse part	no	no	no	no	no	no	no	synaptic membrane	no	no	no	no	no	no	no	no	no	no	no	no	no	no	no	no	no	no	no	no	no	no	no	no	no	no	no	no	no	no	no	no	no	no	no	no	no	no	no
ENSMUSG00000070047	Fat1	no	cell projection	cytoplasmic part	no	cell junction	no	no	no	no	no	no	no	no	no	no	no	no	no	no	no	no	no	no	no	no	no	no	no	no	no	no	no	no	no	no	no	no	no	no	no	no	no	no	no	no	no	no	no
ENSMUSG00000070570	Slc17a7	synapse part	no	cytoplasmic part	no	cell junction	no	no	no	no	no	no	no	no	no	no	cytoplasmic vesicle	vesicle	cytoplasmic membrane-bounded vesicle	membrane-bounded vesicle	no	transporter activity	no	cell fraction	no	no	no	no	insoluble fraction	no	membrane fraction	substrate-specific transmembrane transporter activity	substrate-specific transporter activity	transmembrane transporter activity	clathrin-coated vesicle	coated vesicle	no	no	no	ion transmembrane transporter activity	synaptic vesicle	no	no	no	no	no	endomembrane system	no	no
ENSMUSG00000070695	Cntnap5a	no	no	no	no	no	no	no	no	no	no	no	receptor binding	no	no	no	no	no	no	no	no	no	no	no	no	no	no	no	no	no	no	no	no	no	no	no	no	no	no	no	no	no	no	no	no	no	no	no	no
ENSMUSG00000073591	Pcdhb22	no	no	no	no	no	no	no	no	no	no	no	no	no	no	no	no	no	no	no	no	no	no	no	no	no	no	no	no	no	no	no	no	no	no	no	no	no	no	no	no	no	no	no	no	no	no	no	no
[truncated: 114 more columns]

## Sheet: rough draft ∆logp plot
GO category	∆ log p	N
From experiment
GO category	∆ log p	N
Synapse part	-5.22994	136
Regulation of synaptic plasticity	-3.2266	42
Cell adhesion	1.22915	132
Location
GO category	∆ log p	N
SYNAPSE PART	-5.22994	136
synaptic membrane	-3.91312	76
REGULATION OF SYNAPTIC PLASTICITY	-3.2266	42
postsynaptic membrane	-2.82391	60
cytosol	-2.04096	32
synaptosome	-1.56736	25
endomembrane system	-1.40204	32
secretory granule	-1.31605	17
neuron spine	-1.30698	44
cytoplasmic vesicle membrane	-1.2713	20
clathrin coated vesicle membrane	-1.10705	18
neuron projection terminus	-1.04612	19
dendritic shaft	-0.988853	13
synaptic vesicle	-0.978746	38
synaptic vesicle membrane	-0.716719	16
axon terminus	-0.666255	17
presynaptic membrane	-0.645873	26
axon part	-0.626286	21
site of polarized growth	-0.325972	22
growth cone	-0.325972	22
membrane raft	-0.215811	16
anchored to membrane	0.0474937	16
cell leading edge	0.207678	18
cell-cell junction	0.227605	14
excitatory synapse	0.352262	12
CELL ADHESION	1.22915	132
excitatory synapse	0.352262	12
Molecular function
GO category	∆ log p	N
lipid binding	-6.80936	26
SYNAPSE PART	-5.22994	136
transporter activity	-3.52288	50
REGULATION OF SYNAPTIC PLASTICITY	-3.2266	42
channel activity	-2.04096	32
GTPase regulator activity	-1.30277	18
nucleoside-triphosphatase regulator activity	-1.24185	20
extracellular ligand-gated ion channel activity	-1.15614	20
glutamate receptor activity	-0.988853	14
inorganic anion transmembrane transporter activity	-0.814175	18
PDZ domain binding	-0.770062	20
anion transmembrane transporter activity	-0.770062	20
calcium ion binding	-0.734344	30
excitatory extracellular ligand-gated ion channel activity	-0.615467	12
small GTPase regulator activity	-0.575608	14
chloride transmembrane transporter activity	-0.502103	16
chloride channel activity	-0.502103	16
anion channel activity	-0.502103	16
cell adhesion molecule binding	-0.263205	12
chloride channel complex	-0.227605	14
protein homodimerization activity	0.180851	22
beta-catenin binding	0.227605	14
CELL ADHESION	1.22915	132
